# Supplementary material for: Cranial biomechanics underpins high sauropod diversity in resource-poor environments
Source: PubMed Central journal article supplement (PMC4213629; doi:10.1098/rspb.2014.2114), 2014-11-22
Supplement: rspb20142114supp1.pdf [file rspb20142114supp1.pdf]

## Supplementary information

### Cranial biomechanics underpins high sauropod diversity in resource-poor environments

Button, David J.<sup>a,b</sup>, Rayfield, Emily. J.<sup>a</sup>, and Barrett, Paul M.<sup>b</sup>

<sup>a</sup> University of Bristol School of Earth Sciences, Life Sciences Building, 24 Tyndall Avenue, Bristol, UK, BS8 1TP..

<sup>b</sup> Department of Earth Sciences, The Natural History Museum, Cromwell Road, London, UK, SW7 5DB.

#### Table of contents

|    |                                                                              |    |
|----|------------------------------------------------------------------------------|----|
| 10 | 1. Taxon choice.....                                                         | 2  |
| 11 | 2. Specimen measurements and taxon ages.....                                 | 2  |
| 12 | 3. Functional characters.....                                                | 3  |
| 13 | 4. Multivariate analysis.....                                                | 21 |
| 14 | 5. Multivariate analysis: additional results.....                            | 24 |
| 15 | 6. Statistical tests of group separation in biomechanical functionspace..... | 25 |
| 16 | 7. Phylomorphospace.....                                                     | 26 |
| 17 | 8. Muscle reconstruction and force estimation.....                           | 27 |
| 18 | 9. Finite-element model construction.....                                    | 31 |
| 19 | 10. Static biting analysis additional results.....                           | 37 |
| 20 | 11. Branch-stripping analyses.....                                           | 39 |
| 21 | 12. Supplementary references.....                                            | 43 |

23           **1. Taxon choice**

24 Measured specimens were those of all named sauropods (*sensu* [1, 2]) represented from  
25 craniodental remains sufficient to code them for at least 20% of the functional characters (see  
26 section 2). Taxa known only from teeth were rejected. Additionally data from the *nomen*  
27 *dubium* “*Astrodon*” were not included in disparity analyses as the association of relevant  
28 material is based only on assumed provenance [3].

29 Wherever possible data were only included from adult specimens. Ontogenetic status was  
30 assessed by the degree of sutural fusion of associated postcranial material, or where only  
31 crania are known, the degree of braincase suture fusion. In taxa where cranial material from  
32 multiple individuals is known (*Tazoudasaurus*, *Diplodocus*, *Camarasaurus* and  
33 *Europasaurus*) the overall size of the skull could also be used. However, due to the scarcity  
34 of sauropod cranial material measurements from subadult specimens were included for  
35 *Shunosaurus* and *Giraffatitan*.

36           **2. Specimen measurements and taxon ages**

37 A list of all specimens used, along with the raw measurements, is included in Supplementary  
38 Data, as are taxon occurrence ages and specimen references. All measurements were made in  
39 millimetres.

40           **Institutional Abbreviations used in Supplementary Data:**

41 **AMNH** – American Museum of Natural History, New York, USA; **ANS** - Academy of  
42 Natural Sciences, Philadelphia, USA; **CMNH** - Carnegie Museum of Natural History,  
43 Pittsburgh, USA; **CPSGM** - collections paléontologiques du Service géologique du Maroc,  
44 direction de la Géologie, ministère de l'Énergie et des Mines, Rabat, Morocco; **CPT** - Museo  
45 Fundación Conjunto Paleontológico de Teruel, Teruel, Spain; **CV** - Chongqing Museum of  
46 Natural History, Sichuan, China; **DFMMh** - Dinosaurier-Freilichtmuseum, Münchehagen,

47 Germany; **DINO** – Dinosaur National Monument, Jensen, Utah, USA; **FMNH PR** – Field  
48 Museum of Natural History, Chicago, USA; **IVPP** - Institute of Vertebrate Palaeontology and  
49 Palaeoanthropology, Beijing, China; **MACN** - Museo Argentino de Ciencias Naturales,  
50 Buenos Aires, Argentina; **MAL** – Malawi Department of Antiquities Collection, Lilongwe  
51 and Nguludi, Malawi; **MB.R.** - Humboldt Museum Für Naturkunde, Berlin, Germany; **MDE**  
52 – Espérazza Dinosaur Museum, Aude, France; **MDS** - Museo de Dinosaurios de Salas de los  
53 Infates, Sala de los Infantes, Burgos, Spain; **MMN** - Musée National du Niger; **MPCA** -  
54 Museo Provincial Carlos Ameghino, Río Negro, Argentina **MPEF** - Museo Paleontológico  
55 Egidio Feruglio, Trelew, Argentina; **MTM** – Musée de sciences de la Terre de Rabat,  
56 Morocco, **MZSP-PV** - Museu de Zoologia da Universidade de São Paulo, São Paulo, Brazil;  
57 **PIN** Russia Academy of Sciences, Moscow, Russia; **PMU** – Paleontological Museum,  
58 Uppsala, Sweden; **SMA** - Sauriermuseum, Aathal, Switzerland; **UA** – Université d’  
59 Antananarivo, Antananarivo, Madagascar; **UNSM** – United States National Museum,  
60 Washington DC, USA; **YPM** – Yale Peabody Museum, New Haven, USA; **ZDM** - Zigong  
61 Dinosaur Museum, Sichuan, China; **ZNM** - Zhejiang Museum of Natural History **Z.PAL** –  
62 Palaeobiological Institute of the Polish Academy of Sciences, Warsaw, Poland.

### 63 **3. Functional characters**

64 A total of 20 functional characters were measured from the mandible and skull of 35  
65 sauropod taxa, to quantify the cranial functional disparity of the clade. Most analyses of  
66 functional disparity in cranial elements have focused on the mandible [e.g. 5-8] due both to  
67 its near-exclusive role in feeding (in contrast to the skull, which has multiple roles potentially  
68 resulting in functional compromise) and also to increase taxon coverage [6, 7]. However, as  
69 we are interested in the disparity of the entire cranium with respect to feeding-related  
70 specializations, characters of both the skull and mandible were included. This also allowed  
71 the inclusion of taxa known from good skull material but fragmentary or absent mandibular

72 remains. Characters were measured from published photographs and reconstructions, and  
73 where possible from CT reconstructions and direct examination of relevant material. All jaws  
74 and skulls were orientated equally for each measurement, with the level of the base of the  
75 toothrow horizontal for measurements taken in lateral or medial aspect. In taxa such as  
76 *Nigersaurus* and *Diplodocus* with highly abbreviated toothrows these elements were  
77 orientated so that the dorsal edge of the dentary/ventral edge of the maxilla lay at the  
78 horizontal. Measurements were taken in the program ImageJ (Rasband 1997-2012,  
79 <http://rsb.info.nih.gov/ij/>)

80 Sixteen of the characters are continuous measurements, and four are binary. The binary  
81 characters concern dental features, such as style of occlusion, that are difficult to quantify but  
82 show great variance within Sauropoda and have been inferred as distinguishing different  
83 functional classes [9-12]. Whilst most previous work on quantifying disparity has tended to  
84 use continuous characters exclusively, a similar combination of continuous measures and  
85 binary dental characters was utilized by Anderson *et al.* [6] in their investigation of early  
86 gnathostomes. The continuous characters represent a range of metrics associated with  
87 biomechanical performance and/or feeding ecology. The measurements required for each  
88 character are illustrated below on schematic images of the skull and mandible of  
89 *Camarasaurus lentus* (reconstructed and redrawn from CMNH11338, both from the Avizo  
90 reconstruction presented within and from [13]), with other taxa where appropriate.

## 91 *Continuous characters*

### 92 **(C1) Skull length**

93 In herbivorous taxa increased body size expands foraging abilities, due to both the positive  
94 relationship between size and bite force [e.g. Wroe *et al.*, 2005] and the inverse relationship  
95 between minimal acceptable diet quality and body size [e.g. Clauss *et al.*, 2013].

96 Additionally, in nonchewing herbivores such as sauropods, skull size directly affects gape  
97 size and bite volume and hence the maximum size of fodder that can be ingested and foraging  
98 behaviour. Sauropods utilized the entire toothrow for cropping, with no or minimal oral  
99 processing [Christiansen, 1999; Upchurch & Barrett, 2000; Hummel & Clauss, 2011; Sander  
100 *et al.*, 2011], and so gape size, jaw area and bite volume would have been the primary  
101 constraints acting upon their food intake rate [Christiansen, 1999]. Sauropods appear to have  
102 lost cheeks during their phylogenetic history [Barrett & Upchurch, 20007; Upchurch *et al.*,  
103 2007] potentially to increase gape size in association with bulk-feeding and increase intake  
104 rates [Barrett & Upchurch, 20007; Upchurch *et al.*, 2007; Sander *et al.*, 2011].

105 Skull length was measured along the ventral margin of the skull from the anterior tip of the  
106 skull to the anterior edge of the quadrate (figure S1). This measurement was chosen over the  
107 total skull length as it can be estimated from the mandible in taxa from which the cranium is  
108 not known. In such cases it was taken as the distance from the anterior tip of the dentary to  
109 the anterior margin of the articular glenoid. Additionally, this measure serves as a proxy for  
110 gape size, which becomes relatively decoupled from total skull length in diplodocoid taxa due  
111 to dorsoposterior rotation of the occiput, translational movement at the jaw joint and the  
112 shortening of the mandible.

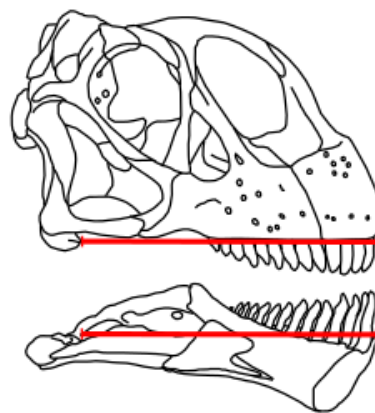

113

114 **Figure S1:** Measurements taken for the length of the skull ventral margin. Top: measurement  
115 of the character from the skull in lateral view, from the anterior tip of the snout to the anterior  
116 edge of the quadrate condyle. Bottom: alternative measurement of the character from the  
117 mandible in medial view, from the anterior tip of the dentary to the anterior margin of the  
118 articular glenoid. The latter measurement was used in taxa from which only mandibular  
119 remains are known.

## 120 **(C2) Anterior mechanical advantage of the mandible**

121 The mandible of vertebrates can be modelled as a third-order lever [14-16] where the  
122 mandibular musculature provides an input force, acting about the articular joint to exert an  
123 output force at the biting tooth. A simple measure of the efficiency of such a system is its  
124 Mechanical Advantage (MA, [15]) the ratio between the inlever and outlever, which  
125 represents the proportion of the input force that is transferred to the bite point. In a vertebrate  
126 jaw in lateral view the inlever can be approximated as the distance from the jaw adductor  
127 muscle attachment to the articular joint, and the outlever likewise approximated as the  
128 distance from the articular joint to the biting tooth. Although a simplification of a complex  
129 system involving multiple muscles of differing lines of action [16], MA is known to correlate  
130 with diet in extant fish [15-17] and the measure has been widely applied to extinct taxa  
131 including dinosaurs [18]. MA varies inversely with the speed of jaw closure and is often  
132 thought to increase in herbivorous lineages where speed of closure is no longer important  
133 (e.g. [19]). Stayton [19] found that although herbivorous lizards do not show overall  
134 convergence in jaw morphology, they do show convergence in increased mechanical  
135 advantage.

136 The MA at the anterior-most tooth position, furthest from the fulcrum, represents the lowest  
137 potential MA in the jaw. The inlever was measured from the centre of the jaw articulation to

138 the middle of the attachment area of the adductor musculature along the dorsal surface of the  
139 surangular, as in Anderson *et al.* [7] and Stubbs *et al.* [8]. This site was chosen due to the  
140 importance of the relatively efficient external adductors in static biting, and also that as many  
141 of the measured mandibles were known only in lateral view medial muscle attachment sites  
142 are more ambiguous. For simplicity, the resultant line of action of the muscle force was  
143 treated as lying perpendicular to the inlever.

144 The outlever was measured from the jaw articulation to the dentary at the point of the biting  
145 tooth. This position was chosen instead of at the tip of the biting tooth itself to allow  
146 comparison between specimens where some are known only with broken, missing or  
147 immature teeth, as in [15, 16]. Technically, outlever length will vary throughout biting,  
148 shortening during jaw closure and lengthening during jaw opening. However, this relative  
149 effect will influence all jaws, so only a single measurement on the jaw in horizontal  
150 orientation (closed- and so maximum outlever length) was made to avoid redundancy.

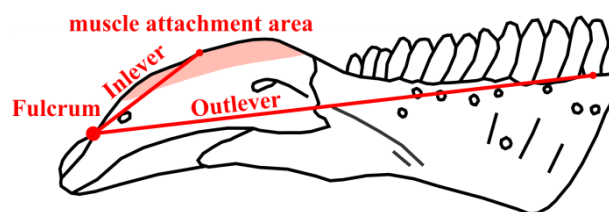

151

152 **Figure S2:** Measurements taken for the calculation of C2, anterior mandibular mechanical  
153 advantage.

### 154 (C3) Posterior mechanical advantage of the mandible

155 The MA at the posteriormost bite point represents the greatest possible MA along the  
156 tooththrow. It was calculated in the same manner as above, but with the outlever as the distance  
157 from the jaw articulation to the dentary at the point of the posteriormost tooth.

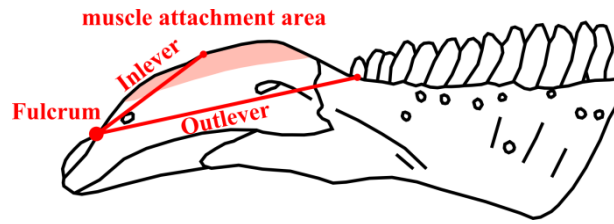

158

159 **Figure S3:** Measurements taken for the calculation of C3, posterior mandibular mechanical  
 160 advantage.

161 **(C4) Articular offset of the jaw/jaw length**

162 The position of the articular joint influences the occlusal pattern of the teeth. If the jaw joint  
 163 lies in line with or close to the line of the toothrow the teeth will occlude in a scissor-like  
 164 pattern, with the posterior teeth coming into occlusion first. In contrast, if the jaw joint is  
 165 significantly offset from the level of the toothrow the teeth will meet in simultaneous  
 166 occlusion. In extant mammals the former condition is seen in carnivores whereas the latter is  
 167 typical of herbivores where simultaneous occlusion is important for the processing of plant  
 168 matter [21]. Similarly, many extinct herbivorous groups demonstrate a jaw joint offset from  
 169 the level of the toothrow [22] including many sauropods [11], so that an offset jaw joint is  
 170 often taken as a general osteological correlate of herbivory [22].

171 The articular offset was measured by drawing a line level with the tooth-bearing portion of  
 172 the jaw (the level of the toothrow itself was not used for the same reasons as referred to  
 173 above) and then measuring the distance to the articular along a line drawn perpendicular to  
 174 this (figure S4). This measurement was then divided by the overall jaw length to standardize  
 175 the measurement for size. In taxa where the lower jaw is unknown this was estimated by the  
 176 ventral offset of the quadrate articular condyle relative to the level of the maxillary ventral  
 177 margin, divided by skull length.



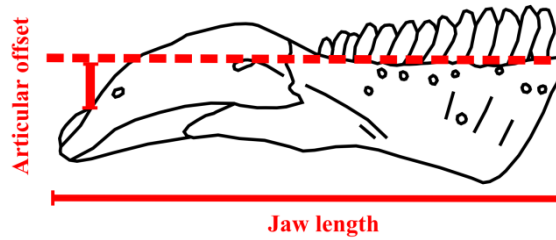

178

179 **Figure S4:** Illustration of the measurements taken to calculate C4, articular offset/jaw length.

180 **(C5) Relative length of the tooththrow**

181 A longer tooththrow will result in a greater total variance in speed and power of a bite across  
 182 the jaw. Additionally, it signifies a greater total area available for the cropping of vegetation.  
 183 Tooththrow length varies markedly within sauropods, with the convergent development of very  
 184 short tooththrows restricted to the anterior end of the jaw in multiple taxa. The relative length  
 185 of the tooththrow was calculated by taking the total length from the anterior-most to  
 186 posteriormost tooth position of the mandible, and dividing it by the total mandible length  
 187 (figure S5). In some sauropods the upper and lower tooththrows are mismatched in length; the  
 188 relative length of the lower tooththrow was chosen as in such instances it is always the shorter,  
 189 so any successive teeth in the upper tooththrow will not be participating in occlusion.

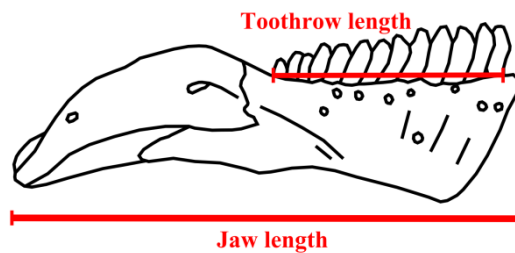

190

191 **Figure S5:** Illustration of the measurements taken for C5, the relative length of the tooththrow.

192 **(C6) Maximum mandible height<sup>3</sup>/mandible length**

193 The mandible can be modelled as a beam, where its flexural stiffness will be proportional to  
 194 the second moment of area ( $I$ ), a measure of the distribution of material around the centroid

195 of the cross-sectional of a beam [23, 24]. It has been used as a proxy for resistance to bending  
196 of the mandible in multiple groups [e.g. 25, 26], including archosaurs [8, 27]. However,  
197 calculation of the second moment of area requires knowledge of the cross-section of the jaw,  
198 and as many of the specimens used in this study have only been figured in lateral view this  
199 was not possible.

200 In calculation of  $I$  it is the cross section dimension along the axis of the load that is most  
201 important [7, 24]. In a jaw the primary load will be in the dorsoventral plane, so the height of  
202 the jaw can potentially serve as a functionally relevant proxy for resistance to bending under  
203 these loads [7], and height<sup>3</sup> will vary in proportion with  $I$ . Hence, the maximum dorsoventral  
204 height of the mandible was measured, cubed, and divided by the total length (figure S6). As a  
205 result, this measure is not dimensionless. However, size is important in mechanical  
206 performance, and structurally ‘inefficient’ structures can compensate simply by being larger  
207 [e.g. 28]. Unusually, sauropod mandibles tend to become deeper anteriorly, so the deepest  
208 region lies close to the symphysis, inferred as associated with a strengthening of the tooth-  
209 bearing portion of the jaw against loads associated with cropping behaviours [11].

210 Using the height of the jaw as a proxy for flexural stiffness in this manner does assume both a  
211 consistent width and uniform material across all jaws. Although both of these are ultimately  
212 inaccurate, if they are broadly consistent across the taxa being investigated jaw height can  
213 still serve as a reasonable comparative metric between taxa (see Anderson *et al.*, [7], who  
214 utilized this character in their analysis of basal tetrapods). This is generally the case amongst  
215 sauropods, although is potentially problematic for the aberrant taxon *Nigersaurus*, in which  
216 although the mandible is comparatively deep in lateral view parts of the mandibular elements  
217 themselves are around 1mm thickness.

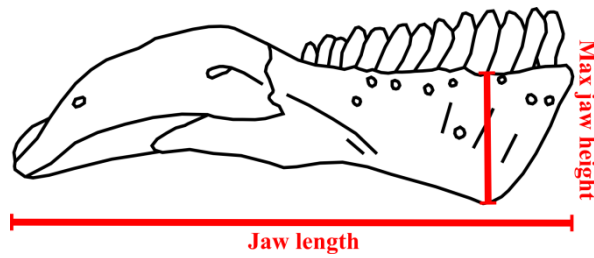

218

219 **Figure S6:** Illustration of the measurements taken for C6, the maximum height of the  
220 mandible/mandible length.

221 **(C7) Average mandible height<sup>3</sup>/mandible length**

222 As with Anderson *et al.* [7]’s analysis of the disparity of basal tetrapods the average height of  
223 the mandible/mandible length was also taken as a proxy for dorsoventral flexural stiffness.  
224 The average height of the mandible was calculated by measuring its area (minus the  
225 dentition) in lateral view, and dividing it by the length of the mandible. This value was cubed  
226 and then divided by the length of the mandible again, in a similar manner to the above  
227 character.

228 **(C8) Maximum symphyseal length/mandible length**

229 Although the morphology of the mandibular symphysis is highly disparate within  
230 Archosauria, all sauropods retained the plesiomorphic symphyseal condition of simple  
231 abutting, unfused plates [29]. Nevertheless, in archosaurs the symphysis is important in  
232 withstanding a range of shear, bending and torsional stresses [30, 31] and transferring force  
233 between the working and balancing sides during asymmetric biting [30]. The dorsoventrally  
234 expanded symphysis of sauropods is inferred to represent an adaptation towards stresses  
235 related to cropping [11]. Walmsley *et al.* [31] demonstrated that linear measurements can  
236 accurately predict the behaviour of the symphysis under various loading conditions. Here the  
237 maximum length of the symphysis relative to the overall mandible length was taken as a  
238 proxy for its mechanical performance, after Anderson *et al.* [7]. The longest dimension of the

239 symphysis across the surface of the union of the jaws was measured and divided by the total  
240 jaw length (figure S7). It is worth noting that the orientation of this measured axis will vary  
241 between taxa. Other measures of symphysis size, primarily the symphysis length along the  
242 long axis of the jaw, were not included as the paucity of specimens figured in medial or  
243 dorsal view resulted in large amounts of missing data.

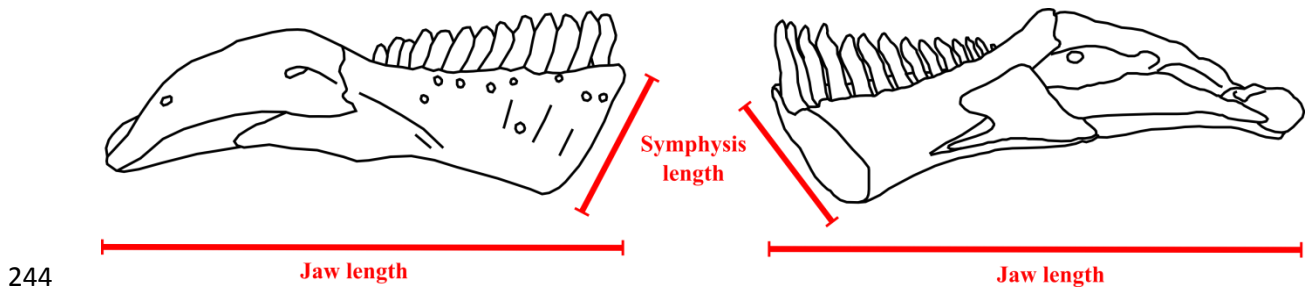

245 **Figure S7:** Illustration of the measurements taken for calculation of C8, mandibular  
246 symphysis maximum length/mandible length, in both lateral (left) and medial (right) views.

247 **(C9) Adductor fossa length/jaw length**

248 The total length of the muscle insertion area on the mandible (adductor fossa length) was  
249 divided by the total mandible length to give a proxy for the relative total area of muscle  
250 attachment (figure S8). This serves as a proxy for the size and, as muscle output force is  
251 proportional to cross sectional area, strength of the jaw musculature.

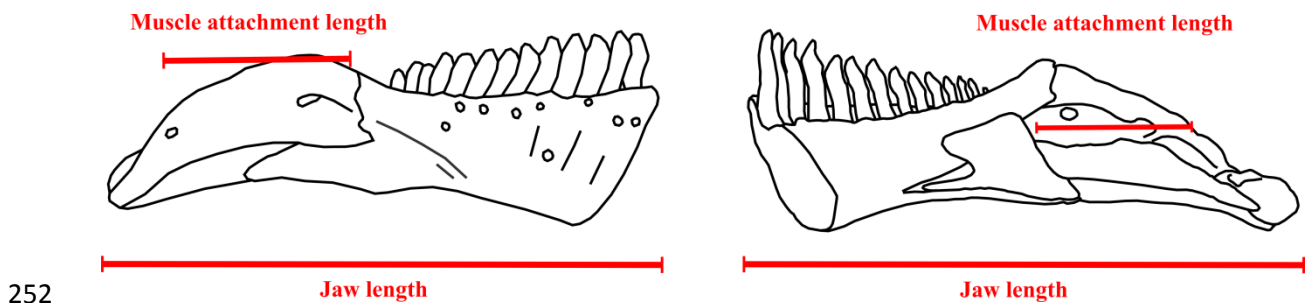

253 **Figure S8:** Illustration of the measurements taken for C9, the adductor fossa length/mandible  
254 length.

255 **(C10) Supratemporal fenestra anteroposterior principal axis length/skull length**

256 The temporal (m. adductor mandibulae externus and m. pseudotemporalis superficialis)  
257 muscles originate from the surfaces of the bones bordering the supratemporal fenestra in  
258 sauropsids [32]. Ideally, the size of the adductors would be constrained by measurement of  
259 the subtemporal fenestra, but the paucity of sauropod skulls figured in ventral view results in  
260 too small a taxon sample. Instead, the principal axes of the supratemporal fenestra were  
261 measured as they can be readily assessed in the more commonly provided dorsal and lateral  
262 views. Principal axes of the supratemporal fenestra were measured as a proxy for area. These  
263 separate measures were chosen over a single measurement of area as it allowed a measure of  
264 supratemporal fenestra size to be taken even in fragmentary specimens including only the  
265 skull roof.

266 The maximum length of the anteroposterior axis of the supratemporal fenestra, divided by the  
267 overall anteroposterior length of the skull (figure S9), was taken as a proxy of adductor  
268 muscle strength. This character was measured in dorsal view where possible, otherwise in  
269 lateral view. Comparison of measures of taxa from which both orientations are recorded  
270 indicated the measurements are equivalent.

271 **(C11) Supratemporal fenestra mediolateral axis/skull width**

272 Similarly, the maximum length of the supratemporal fenestra axis divided by the breadth of  
273 the skull (measured across the midpoint of the postorbital bar) was also taken as a proxy for  
274 adductor muscle strength (figure S9). This character was measured in dorsal view. Both C11  
275 and C12 were necessary as some taxa (e.g. *Giraffatitan*) exhibit anteroposteriorly short but  
276 very wide supratemporal fenestrae. Additionally as C11 can be calculated from a lateral view  
277 and C12 from an incomplete posterior skull, measurement of these separate characters  
278 permitted greater completeness relative to a single measurement of dorsal supratemporal

279 fenestra area. In some taxa lacking preserved postorbitals (*Suuwaasea*, *Ampelosaurus*,  
280 *Bonitasaura*) this character was estimated according to reconstruction of the postorbital and  
281 overall width based upon the width of the frontals and position of the posterolateral frontal-  
282 postorbital articulation.

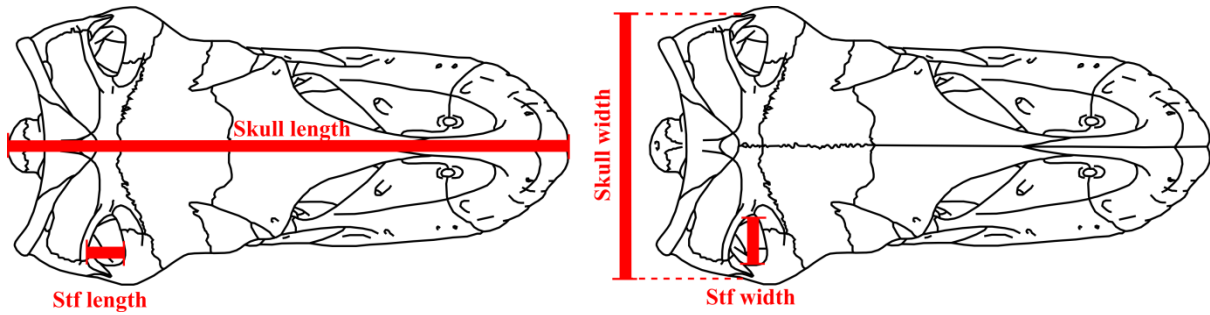

283

284 **Figure S9:** Illustration of the measurements taken for characters C10 (left) and C11 (right).

285 **(C12) Adductor muscle angle**

286 The line of action of the temporal adductor musculature lies along an angle to the vertical  
287 (theoretically varying between 0–90°). Consequentially, the resultant vertical bite force  
288 imparted will vary with the cosine to this angle. It hence follows that, for a given muscle  
289 force, the closer this angle is to vertical the greater the resultant vertical bite force when the  
290 jaws are near closed. The line of action of the temporal muscles varies markedly between  
291 sauropod taxa, with some taxa such as *Camarasaurus* demonstrating a near-vertical adductor  
292 chamber (with the muscles acting upon a more favourable line of action) whereas others such  
293 as *Diplodocus* demonstrate a strongly inclined adductor chamber at >45° to the vertical,  
294 which may be associated with propalinal jaw movement. To quantify this variance, the line of  
295 action of the temporal muscles was reconstructed along the middle of the area of insertion of  
296 the jaw to the middle of the postorbital bar on the articulated skull and jaws in lateral view.  
297 The angle from the vertical of this line of action was then measured (figure S10).

298 The aberrant taxon *Nigersaurus* is problematic in regards to this character as it has closed the  
299 supratemporal fenestrae and a bend in the quadrate blocks the line from the insertion area on  
300 the surangular to the temporal region [33]. Here we follow Sereno *et al.* [33] in assuming that  
301 this muscle mass must have shifted onto the quadrate, and measured the line of action  
302 accordingly.

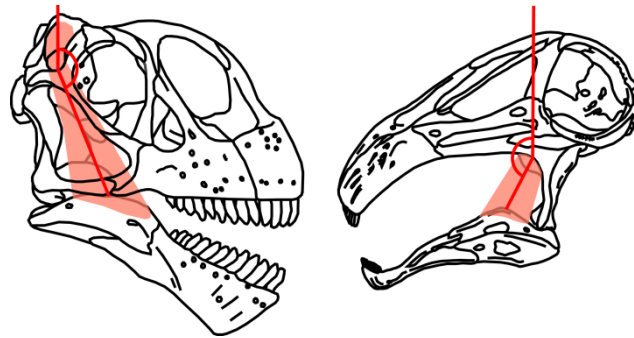

303

304 **Figure S10:** Illustration of the measurement of the angle of the temporal musculature from  
305 the vertical, for C12, in *Camarasaurus* (left) and *Nigersaurus* (right). For *Nigersaurus* the  
306 temporal muscle position, shifted onto the quadrate, of Sereno *et al.* [33] was used.  
307 *Nigersaurus* skull reconstruction modified from [33].

### 308 **(C13) Quadrate condyle length/articular glenoid length**

309 In many herbivorous taxa the anteroposterior length of the articular glenoid is elongated  
310 relative to the anteroposterior length of the quadrate condyle [22], allowing fore-and-aft  
311 movements of the mandible (propaliny) to be used in foraging or processing behaviours. The  
312 same is true of many sauropods, particularly the diplodocids, where it is thought to have been  
313 associated with specialized cropping behaviours [11, 12]. To quantify this the anteroposterior  
314 length of the quadrate condyle was measured and divided by the length of the articular  
315 glenoid. This provides the proportion of the glenoid filled by the quadrate, and so a measure  
316 of how much for-and-aft movement would have been possible (figure S11). Although ideally  
317 measured from a ventral view of the skull and dorsal view of the mandible (figure S11) this

318 character could also be measured from a lateral/medial view of the skull and medial view of  
319 the jaw, and estimated from a lateral view of the jaw where necessary.

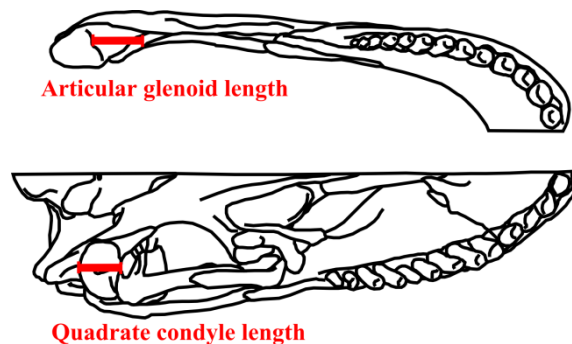

320

321 **Figure S11:** Measurement of the anteriorposterior length of the articular glenoid on the  
322 mandible in dorsal view (top) and quadrate condyle from the skull in ventral view (bottom)  
323 for C13.

324 **(C14) Premaxillary divergence angle**

325 The shape of the snout is correlated with feeding ecology in extant herbivores, with the  
326 general observation that nonselective grazers feeding on low, sward-like vegetation tend to  
327 have broader snouts, as opposed to the narrower snouts of more selective browsers [34-38].  
328 Although a strict association of diet and snout shape is an oversimplification and a  
329 combination of proxies is more appropriate [39], numerous studies have found a similar  
330 relationship between snout shape and diet in extinct mammals [40-42], and such has often  
331 been inferred for herbivorous dinosaurs [e.g. 43]. Whitlock [44] utilized multiple measures of  
332 snout shape in his analysis of sauropod (primarily diplodocid) feeding and found a distinction  
333 in snout breadth between purported ‘grazers’ (*sensu lato*) and browsers, corroborated by  
334 dietary evidence from tooth microwear. One of the measurements employed by Whitlock  
335 [44] was the Premaxillary Divergence Angle (PMDA) the angle between a line drawn from  
336 the external edge of the midline premaxilla-premaxilla suture to the lateral edge of the  
337 premaxilla-maxilla suture and a horizontal line drawn from the midpoint of the snout, in



338 dorsal view (figure S12). This metric was chosen as it is relatively robust to incomplete or  
339 warped material, requiring only a complete premaxilla in dorsal view rather than a fully  
340 reconstructed anterior skull [44] and can be calculated from the width of the premaxilla in  
341 anterior view and length in lateral view using simple trigonometry. In the absence of  
342 preserved premaxillae in the taxa *Tazoudasaurus*, *Patagosaurus*, *Demandasaurus*,  
343 *Antarctosaurus* and *Bonitasaura* the PMDA can be estimated from the anterior attitude of the  
344 dentary in dorsal view, with the external jaw margin adjacent to the fourth dentary tooth  
345 (which would occlude with the final premaxillary tooth) marking the approximate position of  
346 the ventrolateral margin of the premaxilla.

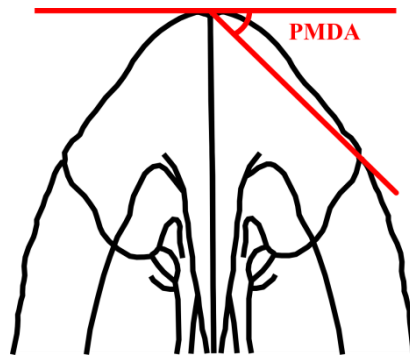

347

348 **Figure S12:** Dorsal view of the snout (premaxillae and anterior part of the maxillae),  
349 demonstrating the measurement of C14, the Premaxillary Divergence Angle (PMDA).

### 350 (C15) Tooth angle

351 The angle of the long axis of the teeth relative to the jaw varies markedly in sauropods, with  
352 taxa such as *Shunosaurus* and *Nemegtosaurus* showing teeth approximately orthogonal to the  
353 jaw margin, with other taxa showing slight/moderate procumbency of the teeth and with  
354 *Diplodocus* showing a highly procumbent dentition that no longer can be brought into  
355 occlusion. Procumbent dentitions, especially highly procumbent ones, will be less effective at  
356 static biting as the inclination of the long axis with respect to the biting direction will result in

357 bending within the teeth; dentitions of varying procumbency probably represent  
358 specializations towards various raking and branch stripping behaviours [11, 45, 46].

359 The angle between the long axis and the tooth and a line at the level of the base of the  
360 toothrow was measured for all teeth present in life position in both the upper and lower  
361 toothrows of each specimen (figure S13). The mean of these values was then taken as the  
362 tooth angle. In some specimens where teeth are absent but damage allows the orientation of  
363 tooth roots and replacement teeth to be seen (e.g. *Apatosaurus*, CMNH11162) the angle of  
364 these were used to estimate the tooth angle.

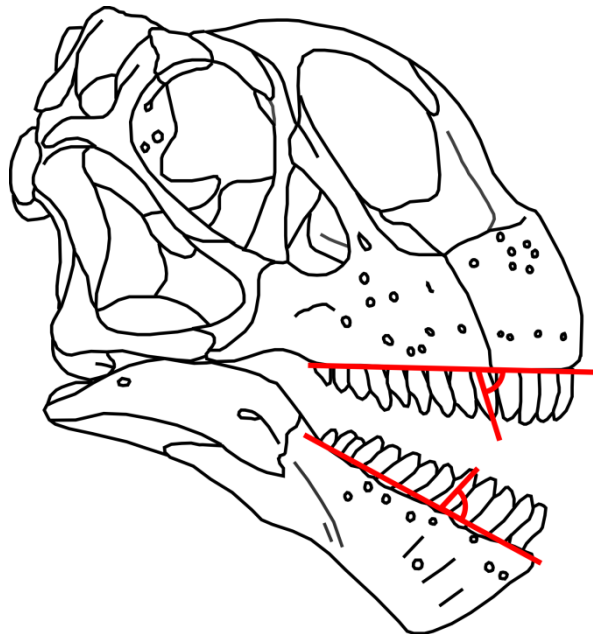

365

366 **Figure S13:** Illustration of the measurements conducted to calculate C15, the tooth angle.  
367 The angle from the level of the jaw for all present teeth, upper and lower, was measured with  
368 the mean then taken as the average tooth angle.

369 **(C16) Tooth slenderness index**

370 The slenderness index of sauropod teeth is the ratio of the height of the crown to the  
371 maximum breadth of the crown. Initially developed as a phylogenetic character [47] it has

372 since been used to classify sauropods into the ‘broad’ and ‘narrow’ crowned functional  
373 groups and trace the comparative diversity of each through time [12, 48]. ‘Broad-crowned’  
374 teeth are more robust, and tend to show the development of heavy mesiodistal wear facets  
375 resulting from interdigitating occlusion. Narrow-crowned teeth in contrast are more gracile,  
376 and generally associated with either more precise shearing or an absence of occlusion.

### 377 *Discrete characters*

#### 378 **(C17) Occlusion: absent (0) or present (1)**

379 The development of occlusion is an important adaptation towards specialized cropping of  
380 coarse foliage observed in eusauropods [49] and *Tazoudasaurus* [50, 51]; contrasting with the  
381 puncture-crushing dentitions of more basal sauropodomorphs [49]. The presence or absence  
382 of occlusion is clear from the presence or absence of tooth-tooth wear facets. However, the  
383 paucity of cranial material from basal sauropod taxa renders it currently unclear as to where  
384 within the basal Sauropoda tooth-tooth occlusion first appeared [49].

385 Within Eusauropoda, diplodocids secondarily lose occlusion [12, 45]. Although the style of  
386 occlusion varies between sauropods (see below), the presence of occlusion is still an  
387 important functional similarity between those taxa that do exhibit occlusion in comparison to  
388 those that do not, hence the inclusion of this character as well as C19 and C20.

#### 389 **(C18) Interdigitating occlusion**

390 The plesiomorphic condition for sauropods, present in most ‘broad-crowned’ forms, consists  
391 of imbricating broad-crowned teeth meeting in an interdigitating occlusion, with each tooth  
392 occluding between two in the opposite jaw. This leads to the development of wear facets on  
393 the mesial and distal margins of each tooth.

#### 394 **(C19) ‘Precision-shear’ bite**

395 Titanosauriform sauropods, at least *Nigersaurus* amongst rebbachisaurids and probably the  
396 dicraeosaurids [11, 12 although see 10] exhibit high-angled apical tooth-tooth wear facets on  
397 the lingual surfaces of upper teeth and the labial surfaces of lower teeth, producing a ‘chisel-  
398 like’ tip in each. This would have resulted from the teeth meeting one from the opposite jaw  
399 in precise one-to-one correspondence, rather than in an interdigitating fashion, along a  
400 relatively high-angled occlusional plane [11, 12]. This guillotine-like ‘precision-shear’ bite  
401 would have been effective at severing through stems and other plant material [11], but would  
402 be less suited to oral processing than the more plesiomorphic interdigitating-bite condition.  
403 Interestingly, many taxa bearing these dentitions specialized for slicing, but not processing,  
404 also show restriction of the toothrow to the front of the snout (resulting on lower maximum  
405 bite forces).

406 Whilst some such taxa (e.g. *Giraffatitan*, *Nemegtosaurus*) possess rare mesiodistal wear  
407 facets [11] the predominance of apical wear facets suggests that interdigitation would have  
408 been rare/insignificant, potentially only resulting from dental aberrations or where a newly  
409 emergent tooth came into opposition against two mature, elongate teeth in the opposite jaw.

#### 410 **(C20) Presence of a self-supporting tooth battery**

411 The rebbachisaur *Nigersaurus* possesses a self-supporting tooth-battery with a highly  
412 elevated number of tooth positions, elevated tooth replacement rates and wear facets that are  
413 continuous from one tooth to the next. This results in the eruption of a series of teeth that  
414 became worn in unison as a single continual blade [33, 52]. Rebbachisaurid cranial material  
415 is rare, but the lack of similar transverse expansion and the presence of distinct alveoli in the  
416 dentary of *Demandasaurus* indicates that such a battery was absent in this taxon. Given the  
417 position of *Demandasaurus* as a closely related nigersaurine [53] it is possible that a dental  
418 battery was restricted to *Nigersaurus*. Although the introduction of a binary character for a

419 single taxon could be potentially problematical, *Nigersaurus* is clearly highly distinct from all  
420 other sauropods in multiple aspects of functional craniodental anatomy; hence the inclusion  
421 of such a character was deemed justified.

#### 422 **4. Multivariate analysis**

423 The continuous biomechanical characters were  $z$ -transformed (standardized so that the mean  
424 of each character was 0, with a standard deviation of 1). These scores were then subjected to  
425 a Principal Coordinate Analysis (PCO), performed in PAST [54] to produce a multivariate  
426 biomechanical morphospace ('functionspace'). The Gower Similarity index was used in  
427 PAST to compute similarity as it can applied to mixed data (containing both continuous and  
428 categorical data). Table S1 presents summary statistics for the first 10 PC axes.

429 **Table S1**

| Axis | Eigenvalue | % variance |
|------|------------|------------|
| 1    | 1.442      | 36.578     |
| 2    | 0.56619    | 16.239     |
| 3    | 0.21846    | 7.4133     |
| 4    | 0.14774    | 3.5628     |
| 5    | 0.12438    | 3.2475     |
| 6    | 0.10671    | 2.6365     |
| 7    | 0.077536   | 1.7826     |
| 8    | 0.064483   | 1.7019     |
| 9    | 0.055172   | 1.3406     |
| 10   | 0.042625   | 1.0713     |

430

431 **Table S1-** Summary statistics for first 10 PC axes, computed in PAST.

432

433 The resulting biomechanical variation is strongly captured by PC axes 1 and 2, which  
434 together account for over 50% of the variance. To investigate the changes in functional  
435 characters within the resulting functionspace the strength of correlation of each character with  
436 PC axes 1 and 2 was tested using the Spearman's Rank Correlation Coefficient, computed in  
437 PAST (table S2).

438

|            | r values and<br>*r <sup>2</sup> values |                        | p- values         |                   |
|------------|----------------------------------------|------------------------|-------------------|-------------------|
|            | PC1                                    | PC2                    | PC1               | PC2               |
| <b>C1</b>  | 0.39154<br>*0.1533                     | -0.18323<br>*0.03357   | <b>0.022802</b>   | 0.79967           |
| <b>C2</b>  | 0.25978<br>*0.06748                    | -0.31499<br>*0.09922   | 0.14148           | 0.15999           |
| <b>C3</b>  | 0.60344<br>*0.3641                     | -0.33946<br>*0.1152    | <b>5.4088E-05</b> | 0.28005           |
| <b>C4</b>  | 0.10717<br>*0.01148                    | -0.46946<br>*0.2204    | 0.29086           | <b>0.008644</b>   |
| <b>C5</b>  | 0.74016<br>*0.5478                     | -0.27786<br>*0.07721   | <b>2.8054E-10</b> | 0.83238           |
| <b>C6</b>  | 0.022773<br>*0.0005186                 | -0.48583<br>*0.236     | 0.47403           | <b>0.014212</b>   |
| <b>C7</b>  | 0.17875<br>*0.03195                    | -0.39377<br>*0.1551    | 0.055792          | 0.094751          |
| <b>C8</b>  | 0.32564<br>*0.106                      | 0.14366<br>*0.02064    | 0.18472           | <b>0.03804</b>    |
| <b>C9</b>  | 0.45013<br>*0.2026                     | -0.14394<br>*0.02072   | <b>0.011131</b>   | 0.54762           |
| <b>C10</b> | 0.56793<br>*0.3226                     | -0.16168<br>*0.02614   | <b>8.4703E-06</b> | 0.54896           |
| <b>C11</b> | 0.47863<br>*0.2291                     | -0.23667<br>*0.05601   | <b>0.00024917</b> | 0.064776          |
| <b>C12</b> | 0.58828<br>*0.3461                     | -0.36801<br>*0.1354    | <b>4.1176E-05</b> | 0.79699           |
| <b>C13</b> | 0.43166<br>*0.1863                     | -0.49822<br>*0.2482    | <b>9.3363E-05</b> | <b>0.038729</b>   |
| <b>C14</b> | 0.81479<br>*0.6639                     | -0.27128<br>*0.07359   | <b>1.1109E-09</b> | 0.68277           |
| <b>C15</b> | 0.21127<br>*0.04463                    | -0.67739<br>*0.4589    | 0.30026           | <b>1.2183E-08</b> |
| <b>C16</b> | -0.85501<br>*0.731                     | 0.17092<br>*0.02921    | <b>1.6693E-12</b> | 0.97061           |
| <b>C17</b> | 0.357<br>*0.1274                       | -0.76193<br>*0.5805    | <b>0.016819</b>   | <b>0.00060712</b> |
| <b>C18</b> | 0.93173<br>*0.8681                     | 0.15914<br>*0.02533    | <b>1.1719E-10</b> | 0.079657          |
| <b>C19</b> | -0.62212<br>*0.387                     | -0.70859<br>*0.5021    | <b>0.00050366</b> | <b>1.028E-08</b>  |
| <b>C20</b> | -0.24481<br>*0.05993                   | -0.039456<br>*0.001557 | 0.092604          | 0.69824           |

440

441

**Table S2-** Strength of association of biomechanical characters with PC axes 1 and 2,

442

computed in PAST. Metrics with a p value of <0.05 are highlighted in bold.

5. Multivariate analysis: additional results

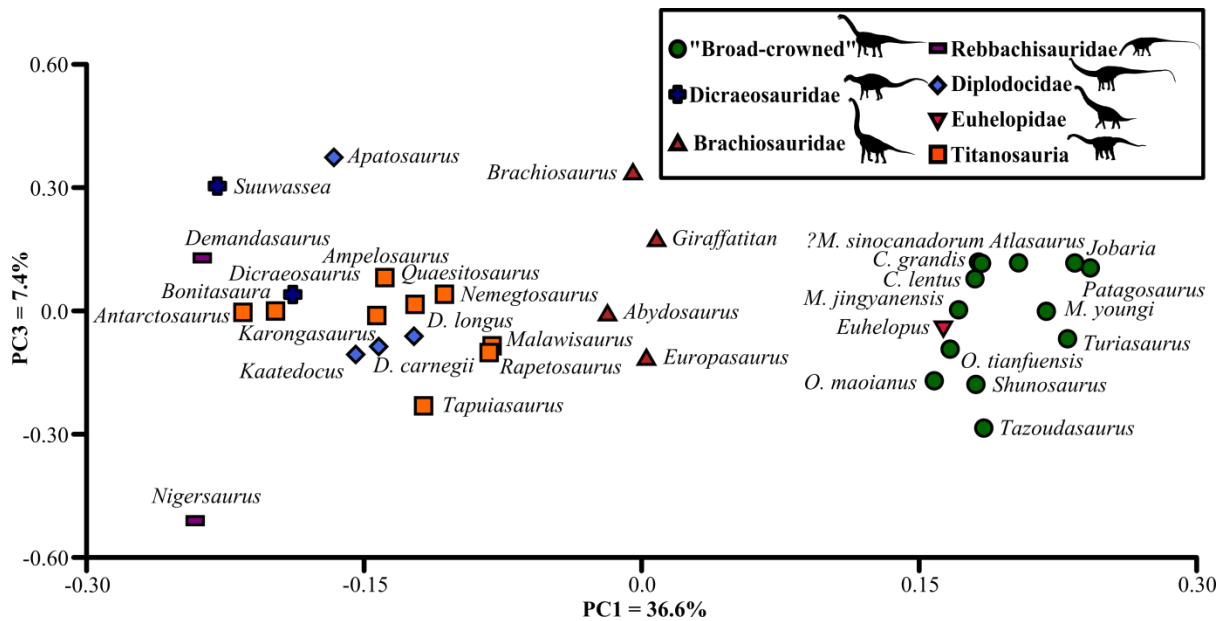

444

445 **Figure S14:** Biomechanical morphospace plot of PC axes 1 and 3.

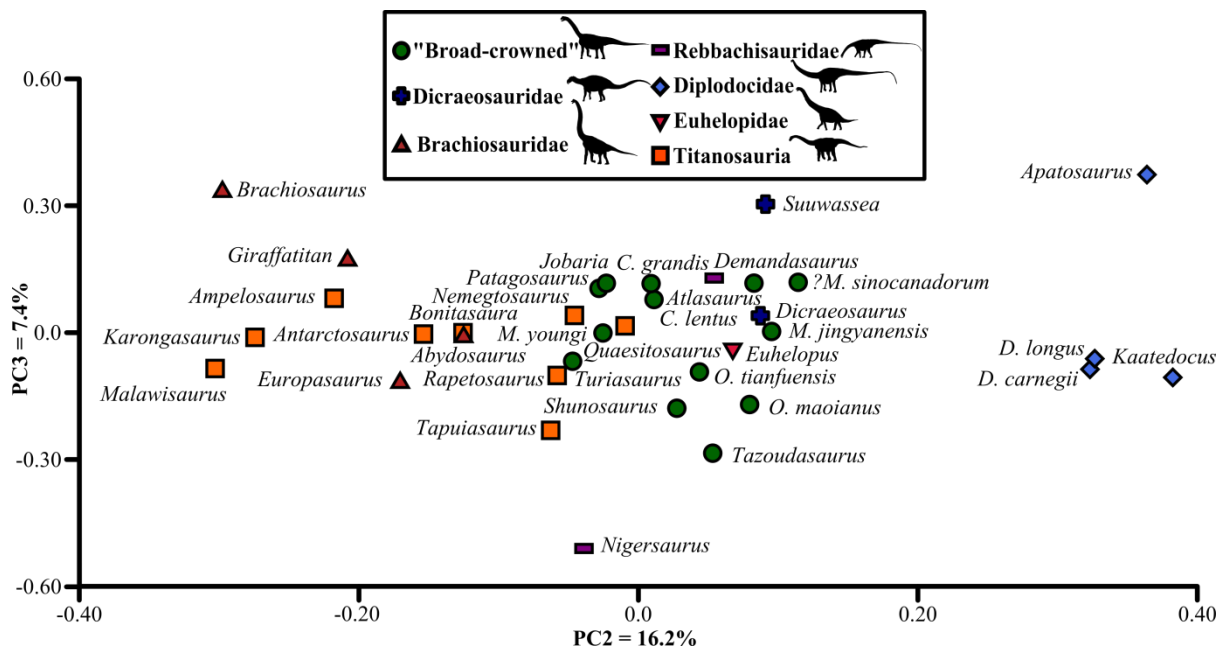

446

447 **Figure S15:** Biomechanical morphospace plot of PC axes 2 and 3.



448

**6. Statistical tests of group separation in biomechanical functionspace**

449

In order to test for the presence of functional convergence between ‘narrow-crowned’  
 450 diplodocoids and titanosaurs, and a functional distinction between a ‘broad-’ and ‘narrow-  
 451 crowned’ forms the taxa were split into 1) basal ‘broad-crowned’ sauropods, 2)  
 452 brachiosaurids, 3) diplodocoids and 4) titanosaurs (*Euhelopus* did not fit into any of these  
 453 groups, and as a single point it could not be distinguished from any of the other groups. It is  
 454 hence not reported on below). Differences in functionspace occupation of these groups was  
 455 then tested with a non-parametric multivariate analysis of variance (npMANOVA) [55] with  
 456 100000 permutations conducted in PAST, utilizing PC scores of the first 18 axes (together  
 457 accounting for 77.6% of the total variance). “Broad-crowned” and brachiosaurid taxa were  
 458 found to be significantly distinct from all the other groupings (table S3). Additionally,  
 459 diplodocoids and titanosaurs, despite showing the convergent occupation of similar areas of  
 460 functionspace, were also found to be significantly different from each other and from all  
 461 other groups (table S3).

462

**Table S3**

|                 | "Broad-crowned" | Diplodocoidea | Brachiosauridae | Titanosauria |
|-----------------|-----------------|---------------|-----------------|--------------|
| "Broad-crowned" |                 | 0.0001        | 0.0003          | <1E-05       |
| Diplodocoidea   | 0.0001          |               | 0.0017          | 0.0097       |
| Brachiosauridae | 0.0003          | 0.0017        |                 | 0.0149       |
| Titanosauria    | <1E-05          | 0.0097        | 0.0149          |              |

463

464

**Table S3:** p-values of npMANOVA testing of functionspace occupation between sauropod

465

groups.

466

## 7. Phylomorphospace

### 467 **Phylogeny**

468 A time-calibrated informal supertree of the Sauropoda (defined as the least inclusive clade  
469 containing *Vulcanodon* and Eusauropoda [1, 2]) was constructed to project into the  
470 biomechanical morphospace (figure S16). Although the exact positions of several sauropod  
471 taxa (e.g. *Patagosaurus*, *Mamenchisaurus*, *Omeisaurus*, *Atlasaurus*) vary between competing  
472 matrices (e.g. [45, 58-61]), a largely resolved topology was produced with the relationships  
473 of basal sauropods based upon [51, 61, 62], those of diplodocoids upon [63, 64] and those of  
474 macronarians upon [62, 65-67]. These phylogenies were chosen on the basis of the taxa  
475 included and date of publication. The phylogenetically problematic Late Triassic putative  
476 sauropod *Lamplughsaura* [68] was not included here as both of the suggested phylogenetic  
477 positions for this animal [see 68] fall outside of the Sauropoda as defined herein.

478 Taxa were dated to the level of Standard European Stages, with the first and last occurrences  
479 taken as concordant with the start of the earliest stage and end of the latest from which they  
480 are known, respectively. These were used to produce a time-calibrated tree utilizing the  
481 timePaleoPhy function within the paleotree package [69] in R (R Core Team, 2013, R  
482 foundation for statistical computing, Vienna, Austria, <http://www.r-project.org/>). Trees were  
483 dated utilizing the ‘minMax’ argument, where an observed date is drawn randomly from a  
484 distribution bounded by the first and last occurrence dates. Branches were scaled as in the  
485 method of Brusatte *et al.* [70], where zero-length branches are avoided through equal  
486 “sharing” of time with a preceding non-zero length branch. A single dated informal supertree  
487 was then projected onto the first two PC axes of the biomechanical “functionspace” utilizing  
488 the phytools package [71] within R.

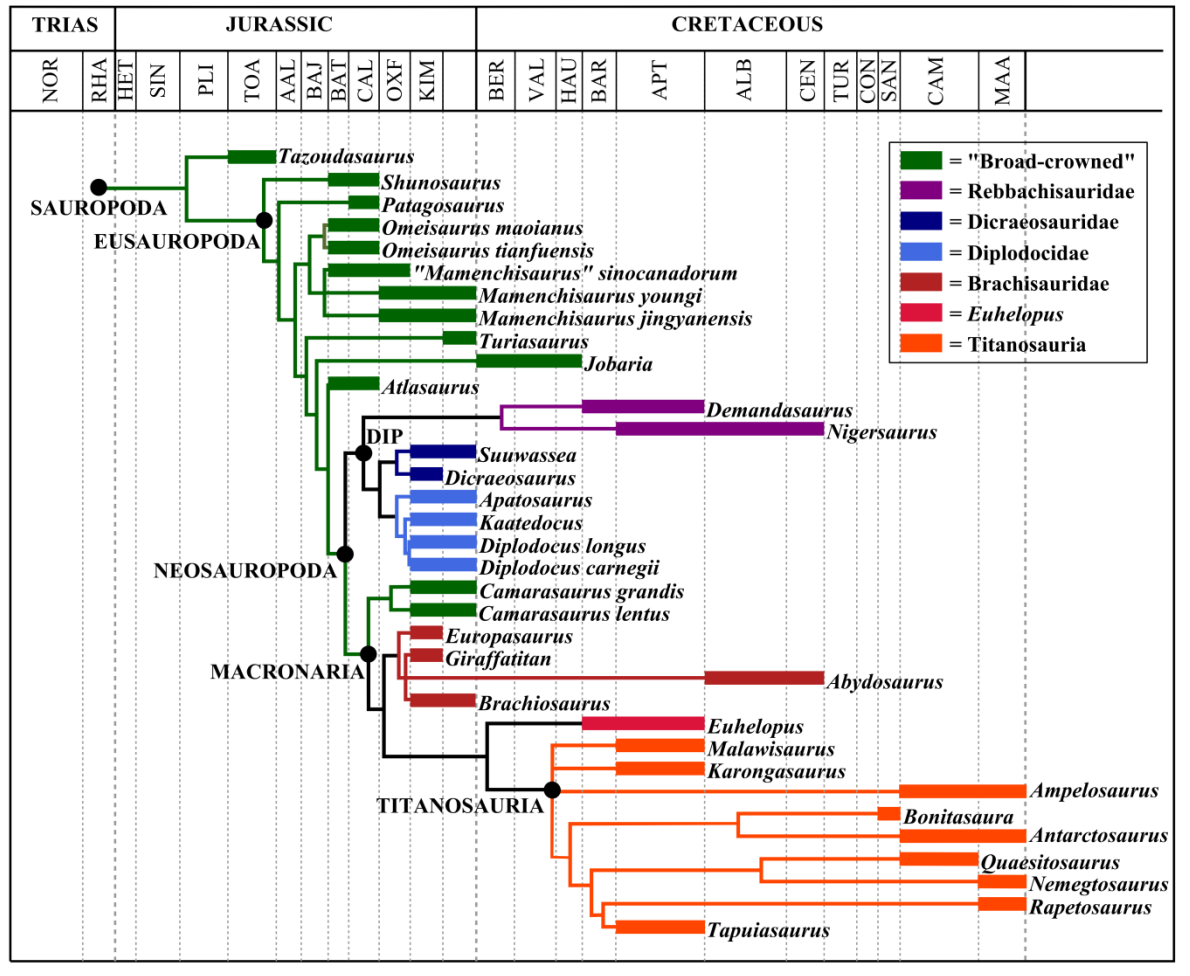

490

491 **Figure S16:** An informal supertree of the Sauropoda, demonstrating the relationships of the  
 492 taxa included in this study (see text). The different groups plotted within the ‘functionspace’  
 493 (see figure 1) are color-coded as in figure 1; of these only the “broad-crowned” grade is not  
 494 monophyletic. DIP = Diplodocoidea.

495 **8. Muscle reconstruction and force estimation**

496 **Muscle abbreviations**

497 **Jaw adductors-** nomenclature follows Holliday [32].

498 m. AMEP- m. adductor mandibulae externus profundus; m. AMEM- m. adductor mandibulae  
 499 externus medialis; m. AMES- m. adductor mandibulae externus superficialis; m. AMP- m.

500 adductor mandibulae profundus; m.PSTs- m. pseudotemporalis superficilias; m. PTd- m.  
501 pterygoideus dorsalis; m. PTv- m. pterygoideus ventralis.

502 **Craniocervical musculature**- nomenclature follows [72]. The occipital of the m. iliocastalis  
503 capitus was reconstructed after [72, 73]; it should be noted, however, that Tsuihiji [74] and  
504 Snively *et al.* [75] were dubious about this insertion in dinosaurs.

505 m. c.- m. complexus; m. i.c.- m. iliocastalis capitis; m. l.c.p.- m. longissimus capitis  
506 profundus; m. l.c.s.- m. longissimus capitis superficialis; m. r.c.v.- m. rectis capitis ventralis;  
507 m. s.c.- m. splenius capitis; m. t.c.- m. transversospinalis capitus

#### 508 **Muscle force estimation**

509 Muscle forces were estimated according to the ‘dry skull method’ [76], where contractile  
510 force equals physiological cross-sectional area multiplied by the specific tension of the  
511 muscle. Although originally developed for use in mammals [76] the two main assumptions-  
512 that muscle cross-sectional surface area is proportional to contractile force and that muscle  
513 sizes can be accurately estimated from osteological remains alone- are equally applicable to  
514 dinosaurs [77]. Muscles were reconstructed in Avizo (Versions 6.3 and 7, FEI Visualization  
515 Science Group) on the basis of osteological correlates and topological relations [32] (figure  
516 S17). The total volume of each was then measured in Avizo using the material statistics  
517 module. This was then divided by the total length of the muscle as estimation of total fibre  
518 length to achieve the physiological cross sectional area (PCSA).

519 CMNH11338 represents a juvenile *C. lentus*. As *Camarasaurus* shows little ontogenetic  
520 change in the skull [4] an adult-sized skull model was obtained by linearly scaling-up the  
521 model of CMNH11338 by a factor of 1.8 in all directions so that it equalled the length of an  
522 adult *Camarasaurus* skull (DINO28, anteroposterior skull length =528mm [78]). Adult

523 muscle cross-sectional areas were then obtained by multiplying the cross-sectional areas  
 524 calculated for CMNH11338 by 3.24 (the square of the linear increase in dimensions).

525 As the specific tension of the muscles of extinct taxa cannot be measured directly, an entire  
 526 possible range was bracketed by using a range of specific tension measures (147 kPa -  
 527 392kPa) for vertebrate muscle [79]. Higher specific muscle tensions would generate  
 528 increased muscle and bite forces, but the relative differences between the two models would  
 529 remain the same. Table S4 compares the resulting range in muscle force values, and the  
 530 resulting upper and lower bounds on bite force resulting from the finite-element models. A  
 531 lower bracket on the jaw muscle volumes was provided by reconstructing the minimum  
 532 possible volumes on the basis of the muscle insertions areas. These volumes, and the  
 533 resulting bite forces, are compared in table S5. Even bite forces from the minimum possible  
 534 *Camarasaurus* muscle volume reconstruction exceed those calculated from the maximum  
 535 muscle volumes for *Diplodocus*. Craniocervical muscle volumes and forces are given in table  
 536 S6.

537 **Table S4**

|                                         | Muscle volume /m <sup>3</sup> | PCSA/m <sup>2</sup><br>(Muscle<br>volume/muscle<br>length) | Minimum muscle<br>force/N (147kPa) | Maximum muscle<br>force/N<br>(392kPa) |
|-----------------------------------------|-------------------------------|------------------------------------------------------------|------------------------------------|---------------------------------------|
| <b><i>Camarasaurus</i> (juvenile)</b>   |                               |                                                            |                                    |                                       |
| m. AMES                                 | 6.93E-05                      | 4.66E-04                                                   | 68.4                               | 182.3                                 |
| m. AMEP                                 | 3.51E-05                      | 1.79E-04                                                   | 26.3                               | 70.2                                  |
| m. AMEM                                 | 3.83E-05                      | 2.46E-04                                                   | 36.2                               | 96.4                                  |
| m. PSTs                                 | 2.51E-05                      | 1.22E-04                                                   | 17.93                              | 47.8                                  |
| m. AMP                                  | 4.33E-05                      | 3.89E-04                                                   | 57.13                              | 152.5                                 |
| m. PTd                                  | 4.73E-05                      | 4.82E-04                                                   | 70.85                              | 188.9                                 |
| m. PTv                                  | 6.51E-05                      | 4.47E-04                                                   | 65.71                              | 175.2                                 |
| <b><i>Camarasaurus</i> (adult size)</b> |                               |                                                            |                                    |                                       |
| m. AMES                                 | 2.25E-04                      | 1.51E-03                                                   | 222.0                              | 592                                   |
| m. AMEP                                 | 1.14E-04                      | 5.8E-04                                                    | 85.26                              | 227.4                                 |
| m. AMEM                                 | 1.24E-04                      | 7.97E-04                                                   | 117.2                              | 312.4                                 |
| m. PSTs                                 | 8.13E-05                      | 3.95E-04                                                   | 58.07                              | 154.8                                 |
| m. AMP                                  | 1.40E-04                      | 1.26E-03                                                   | 185.2                              | 493.9                                 |
| m. PTd                                  | 1.53E-04                      | 1.56E-03                                                   | 229.3                              | 611.5                                 |
| m. PTv                                  | 2.11E-04                      | 1.49E-03                                                   | 219.0                              | 584.1                                 |
| <b>Bite force/N</b>                     |                               |                                                            | <b>Anterior: 342.53</b>            | <b>Anterior: 913.73</b>               |

|                          |          |          | <b>Posterior: 726.91</b>                            | <b>Posterior: 1938.96</b>                           |
|--------------------------|----------|----------|-----------------------------------------------------|-----------------------------------------------------|
| <b><i>Diplodocus</i></b> |          |          |                                                     |                                                     |
| m. AMES                  | 1.26E-04 | 4.47E-04 | 65.71                                               | 175.2                                               |
| m. AMEP                  | 3.66E-05 | 1.04E-04 | 15.29                                               | 40.77                                               |
| m. AMEM                  | 7.32E-05 | 2.44E-04 | 35.87                                               | 95.65                                               |
| m. PSTs                  | 8.29E-05 | 2.63E-04 | 38.66                                               | 103.1                                               |
| m. AMP                   | 5.8E-05  | 3.74E-04 | 55.08                                               | 146.6                                               |
| m. PTd                   | 1.18E-04 | 1.04E-03 | 152.9                                               | 407.7                                               |
| m. PTv                   | 1.77E-04 | 9.08E-04 | 133.5                                               | 355.9                                               |
| <b>Bite force/N</b>      |          |          | <b>Anterior: 124.77</b><br><b>Posterior: 179.54</b> | <b>Anterior: 336.95</b><br><b>Posterior: 479.82</b> |

538

539 **Table S4:** Reconstructed jaw adductor muscle volumes and forces for *Camarasaurus* and  
540 *Diplodocus*.

541 **Table S5**

|                                         | Muscle volume /m <sup>3</sup> | Muscle force/N<br>(392kPa)                          |
|-----------------------------------------|-------------------------------|-----------------------------------------------------|
| <b><i>Camarasaurus (adult size)</i></b> |                               |                                                     |
| m. AMES                                 | 2.07E-04                      | 544.6                                               |
| m. AMEP                                 | 1.07E-04                      | 213.8                                               |
| m. AMEM                                 | 1.20E-04                      | 303.0                                               |
| m. PSTs                                 | 7.48E-05                      | 142.4                                               |
| m. AMP                                  | 1.25E-04                      | 439.6                                               |
| m. PTd                                  | 1.32E-04                      | 525.9                                               |
| m. PTv                                  | 1.12E-04                      | 309.6                                               |
| <b>Bite force/N</b>                     |                               | <b>Anterior: 794.73</b><br><b>Posterior: 1694.1</b> |
| <b><i>Diplodocus</i></b>                |                               |                                                     |
| m. AMES                                 | 5.45E-05                      | 75.73                                               |
| m. AMEP                                 | 3.10E-05                      | 34.57                                               |
| m. AMEM                                 | 3.51E-05                      | 45.91                                               |
| m. PSTs                                 | 2.61E-05                      | 32.48                                               |
| m. AMP                                  | 3.39E-05                      | 85.61                                               |
| m. PTd                                  | 3.69E-04                      | 127.6                                               |
| m. PTv                                  | 4.11E-04                      | 82.57                                               |
| <b>Bite force/N</b>                     |                               | <b>Anterior: 235.5</b><br><b>Posterior: 335.4</b>   |

542

543 **Table S5:** Minimum possible reconstructed jaw adductor muscle volumes and forces.

544 **Table S6**

|                                       | Occipital insertion<br>area (m <sup>2</sup> ) | Estimated muscle<br>cross sectional area<br>(m <sup>2</sup> ) | Minimum muscle<br>force/N (147kPa) | Maximum muscle<br>force/N<br>(392kPa) |
|---------------------------------------|-----------------------------------------------|---------------------------------------------------------------|------------------------------------|---------------------------------------|
| <b><i>Camarasaurus (juvenile)</i></b> |                                               |                                                               |                                    |                                       |
| m. c.                                 | 1.54E-04                                      | 1.06E-04                                                      | 15.58                              | 41.55                                 |
| m. t.c.                               | 2.91E-04                                      | 3.17E-04                                                      | 46.6                               | 124.3                                 |

|                                         |          |          |       |        |
|-----------------------------------------|----------|----------|-------|--------|
| m. s.c.                                 | 2.23E-04 | 3.28E-04 | 48.22 | 128.6  |
| m. l.c.s.                               | 1.81E-04 | 2.71E-04 | 39.84 | 106.23 |
| m. l.c.p.                               | 7.10E-05 | 1.22E-04 | 17.93 | 47.82  |
| m. i.c.                                 | 2.59E-04 | 2.38E-04 | 34.91 | 93.3   |
| m. r.c.v.                               | 1.00E-04 | 1.13E-04 | 16.61 | 44.3   |
| <b><i>Camarasaurus</i> (adult size)</b> |          |          |       |        |
| m. c.                                   | 4.94E-04 | 3.43E-04 | 50.42 | 134.5  |
| m. t.c.                                 | 9.43E-04 | 1.03E-03 | 151.4 | 403.76 |
| m. s.c.                                 | 7.23E-04 | 1.06E-03 | 155.8 | 415.5  |
| m. l.c.s.                               | 5.86E-04 | 8.78E-04 | 129.1 | 344.2  |
| m. l.c.p.                               | 2.30E-04 | 3.95E-04 | 58.07 | 154.8  |
| m. i.c.                                 | 8.39E-04 | 7.71E-04 | 113.3 | 302.2  |
| m. r.c.v.                               | 3.24E-04 | 3.66E-04 | 53.80 | 143.5  |
| <b><i>Diplodocus</i></b>                |          |          |       |        |
| m. c.                                   | 4.12E-04 | 5.11E-04 | 75.12 | 200.3  |
| m. t.c.                                 | 5.30E-04 | 6.48E-04 | 95.26 | 254.0  |
| m. s.c.                                 | 4.18E-04 | 5.56E-04 | 81.73 | 218.0  |
| m. l.c.s.                               | 4.00E-04 | 4.16E-04 | 61.15 | 163.1  |
| m. l.c.p.                               | 2.10E-04 | 2.42E-04 | 35.57 | 94.86  |
| m. i.c.                                 | 1.17E-03 | 6.51E-04 | 95.70 | 255.2  |
| m. r.c.v.                               | 1.04E-04 | 2.66E-04 | 39.10 | 104.3  |

545

546 **Table S6:** Reconstructed craniocervical muscle volumes and forces for *Camarasaurus* and  
547 *Diplodocus*.

## 548 9. Finite-element model construction

549 The *Diplodocus* model utilized in this study is that of Young *et al.* [45], with the input muscle  
550 forces modified as explained above. The *Camarasaurus* model was created for this study, and  
551 is expanded upon below.

### 552 *Camarasaurus* finite-element model convergence test results

553 To save on computing time the majority of *Camarasaurus* models run for the analyses within  
554 were of only 877796 elements. To ensure this was sufficient a number of elements to provide  
555 an accurate representation of the skull and its behaviour under loading, analyses were  
556 performed comparing the stress magnitudes and distributions of models with up to 2.4 times  
557 the number of elements (table S7). Maximum, minimum and average stresses remained  
558 similar between all these runs.

559 **Table S7**

| <b>Number of elements</b> | <b>Minimum element stress /Mpa</b> | <b>Average element stress /Mpa</b> | <b>Maximum element stress /Mpa</b> |
|---------------------------|------------------------------------|------------------------------------|------------------------------------|
| 877796                    | 9.19E-08                           | 0.78                               | 2.09E01                            |
| 1463596                   | 2.73E-08                           | 0.80                               | 2.3E01                             |
| 2133313                   | 0.00                               | 0.79                               | 2.14E01                            |

560

561 **Table S7:** Summary of results for element number convergence tests performed for the  
 562 *Camarasaurus* finite-element model. Increasing the element number, even by a significant  
 563 amount, has minimal effect on average element stresses. Critically, in terms of the results,  
 564 they remain similar to those of the ‘ecological comparison’ *Diplodocus* model and  
 565 significantly less than those of the scaled ‘structural comparison’ *Diplodocus* model in all  
 566 cases.

567 **Material properties**

568 Material properties were assigned to the tissues in the meshing software Hypermesh (Version  
 569 11, Altair). Finite-element modelling of extinct taxa is problematic as the true material  
 570 properties of structures are unknown [80]. Additionally, although cranial bone is anisotropic  
 571 [81] anisotropy cannot be reliably measured in fossil specimens. However, validation studies  
 572 [82, 83] have demonstrated that patterns of stress and strain can be reliably predicted even in  
 573 models utilizing approximated and isotropic material properties, even if absolute magnitudes  
 574 cannot. This means that finite-element analysis can still serve as a comparative tool between  
 575 different loading conditions and different models in extinct taxa, so long as the boundary  
 576 conditions are maintained consistent between them.



577 In the absence of genuine material properties, those of histological analogues were used. To  
578 aid comparison the same properties were used here as by Young *et al.* [45] in their analysis of  
579 *Diplodocus*. Sauropods are typified by fast-growing Haversian bone [84]. As a result, the  
580 skull bone of both taxa was ascribed the material properties of bovine Haversian bone  
581 (Young's Modulus = 23.1GPa; Poisson's ratio = 0.29) [85]. This measure is based upon long  
582 bones (specifically, femora) and so is likely an over-estimate; as such the lowest value of the  
583 Poisson's ratio was used [45]. Dentine was ascribed a Young's modulus of 21GPa and  
584 Poisson's ratio of 0.31 [86] and enamel a Young's modulus of 80GPa and Poisson's ratio of  
585 0.3 [87], again both as in Young *et al.* [45].

586 Unfortunately enamel and dentine could not be easily resolved in the CT scans of  
587 *Camarasaurus*, or modelled separately in the finite-element model. As a result, the teeth of  
588 *Camarasaurus* were modelled as a single tissue of composite material properties (Young's  
589 modulus = 50.5 GPa, Poisson's ratio = 0.305). Sensitivity analyses where the teeth were  
590 instead given the material properties of dentine and enamel [figure S17] demonstrate little  
591 deviance from those employing this composite value.

## 592 **Constraints**

593 Sensitivity analyses constraining six, eight and 10 teeth were performed for each taxon  
594 (figures S18, S19). Each constraining of successive teeth results in minor changes in the  
595 distribution and magnitude of stresses, but overall patterns of stress are similar to those  
596 observed in models with only four constrained teeth. The models were also fully constrained  
597 at the quadrates. The models here replicate a static bite; full constraint at the quadrates was  
598 required. It should be noted, though, that this is potentially unrealistic given the high capacity  
599 for propalinal movements in *Diplodocus*. All constraints were applied as a Diffuse Coupling  
600 Constraint (DCC)- a series of rigid links that spread the constraint over multiple nodes. This

601 reduces problems of localized very high forces correlated with point constraints- indeed, in  
602 both models peak stresses did not occur at a constraint. Use of a DCC spreads out any high  
603 forces associated with constraints more effectively than simply utilizing an equivalent  
604 number of individual constraints, where individual nodes that are proximal to multiple  
605 constraints may become over-constrained, resulting in very high localized stress peaks.

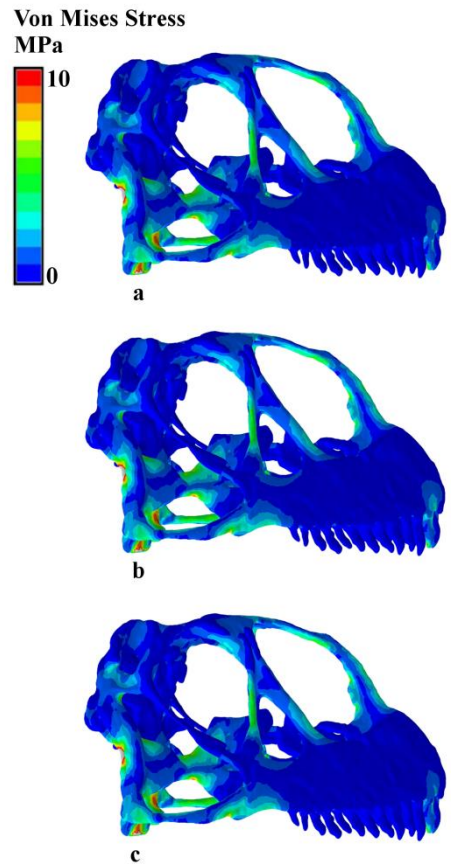

606

607 **Figure S17:** Comparison of analyses where the teeth were assigned intermediate properties  
608 (top), those of dentine (middle) and enamel (bottom). Overall stress patterns deviate little  
609 between these analyses, and only around the biting teeth.

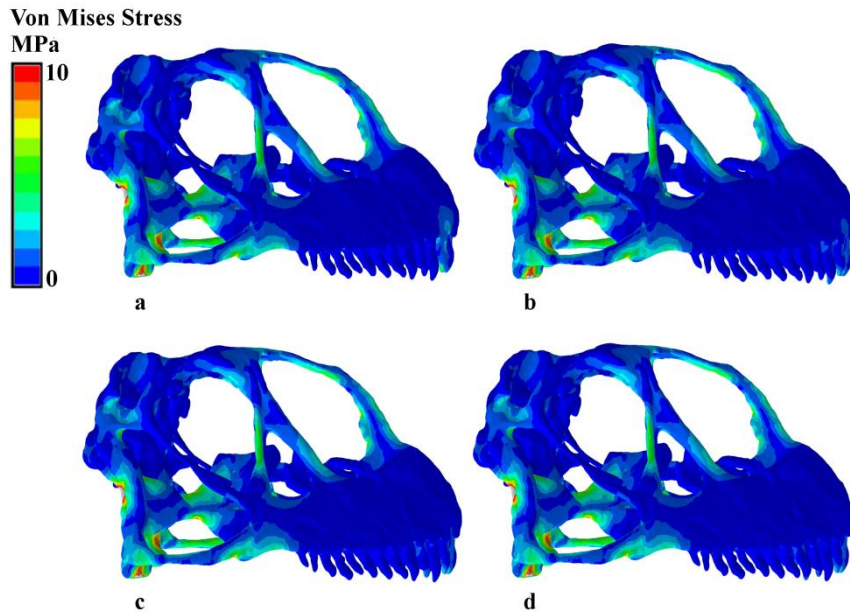

610

611 **Figure S18:** Comparison of sensitivity analyses of *Camarasaurus* constraining successively  
 612 more of the anteriormost teeth. a) Four teeth constrained. b) Six teeth constrained. c) Eight  
 613 teeth constrained. d) Ten teeth constrained. Although the magnitude and distribution of stress  
 614 increases slightly with more constrained teeth, patterns of stress remain consistent.

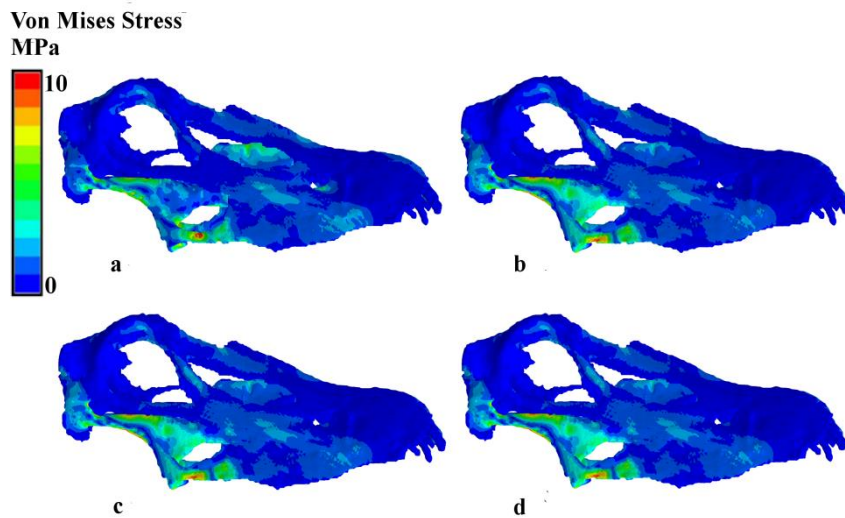

615

616 **Figure S19:** Sensitivity analysis results constraining successively more of the anteriormost  
 617 teeth in *Diplodocus*. a) Four teeth constrained. b) Six teeth constrained. c) Eight teeth  
 618 constrained. d) Ten teeth constrained.

619 For the static biting models the teeth were constrained against translation in the vertical (y)  
620 axis, the plane of biting, to simulate the teeth being brought into opposition against food/the  
621 opposing teeth in an orthal bite. This relatively relaxed constraint was chosen as analyses  
622 constraining the teeth in the x, y and z axes resulted in highly localized stresses in the biting  
623 teeth which were considered to be a result of over-constraint. Nevertheless, comparison of the  
624 results between these analyses differing in the degrees of freedom of the constraints applied  
625 to the teeth show very little difference (table S8). The *Camarasaurus* and both *Diplodocus*  
626 models all show higher peak stresses (in the biting teeth in all cases) but slightly reduced  
627 mean element stresses. Still, the relative performance of the three models, remains the  
628 similar- *Camarasaurus* and the “ecological comparison” *Diplodocus* model show very  
629 similar mean stresses, whereas the “structural comparison” *Diplodocus* model experiences  
630 notably higher peak and mean element stresses. The overall results are hence robust to the  
631 manner in which the constraints were treated.

|                                                 | Min element stress/MPa |           | Mean element stress/MPa |         | Max element stress/MPa |         |
|-------------------------------------------------|------------------------|-----------|-------------------------|---------|------------------------|---------|
|                                                 | Y                      | X, Y, Z   | Y                       | X, Y, Z | Y                      | X, Y, Z |
| <i>Camarasaurus</i>                             | 4.89E-08               | 9.19E-08  | 0.75                    | 0.78    | 20.9                   | 31.6    |
| <i>Diplodocus</i> -<br>ecological<br>comparison | 1.02E-11               | 1.03E-11  | 0.73                    | 0.79    | 28.1                   | 28.9    |
| <i>Diplodocus</i> –<br>structural<br>comparison | 1.37E-<br>011          | 2.01E-011 | 0.99                    | 1.12    | 37.6                   | 39.1    |

632

633 **Table S8** – results from the static biting models comparing analyses constraining the biting  
634 teeth in the y-axis (the plane of biting) alone versus in the x, y and z axes. Overall results are  
635 very similar between the two, except for higher peak forces in the biting teeth in the analyses  
636 with constraint in all axes, considered here to be an artefact due to overconstraint.

637

## 10. Static biting analysis additional results

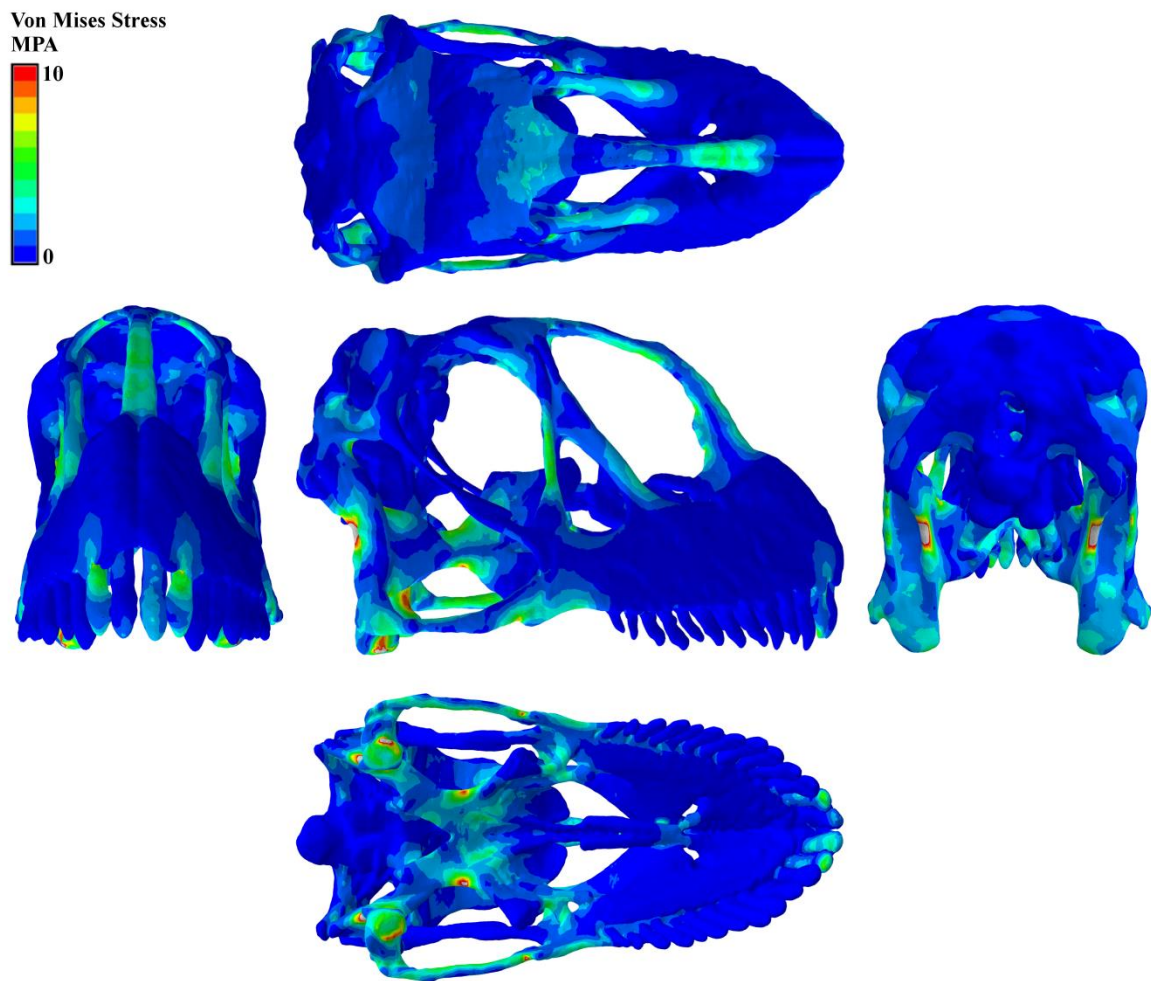

638

639 **Figure S20:** Additional views of the von Mises Stress contour plots FEA of the skull of

640 *Camarasaurus lentus* (CMNH 11338), scaled to adult size.

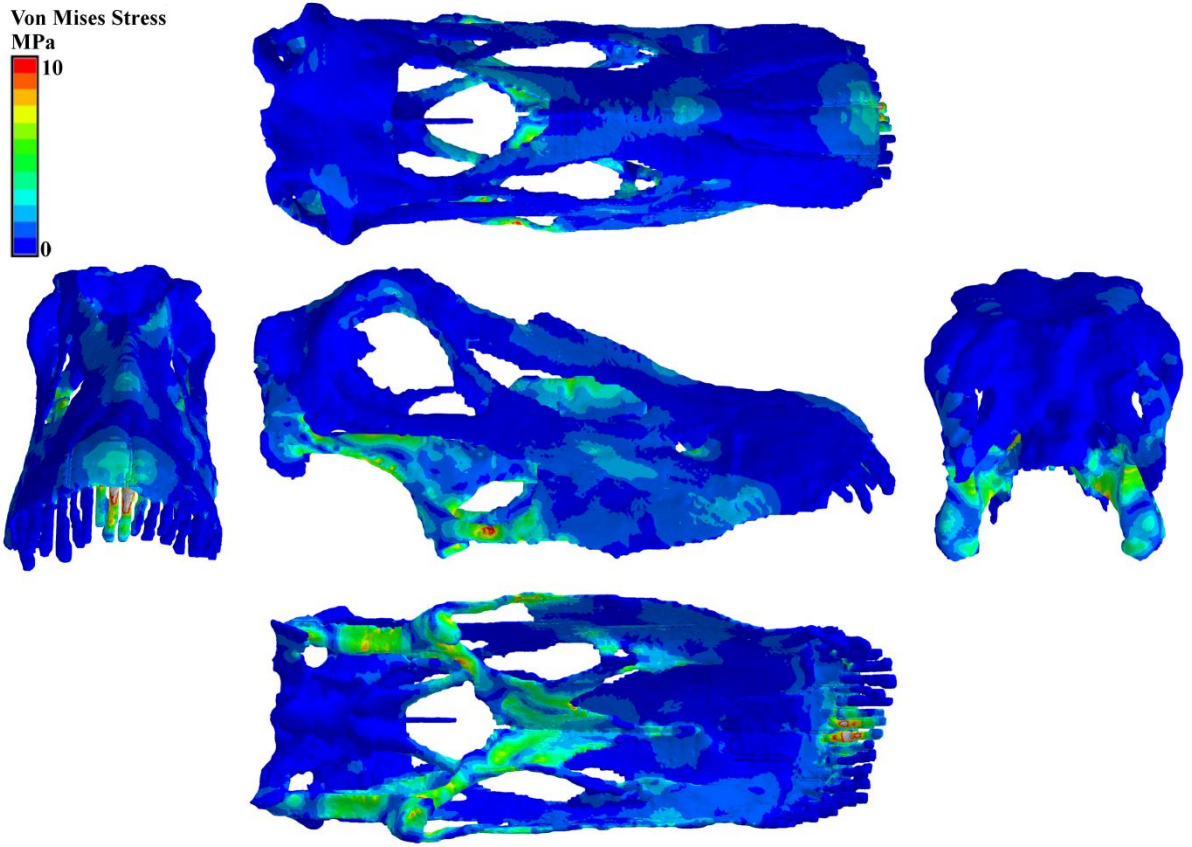

641

642 **Figure S21:** Additional views of the FEA results for the skull of *Diplodocus carnegii*  
643 (CMNH 11161).

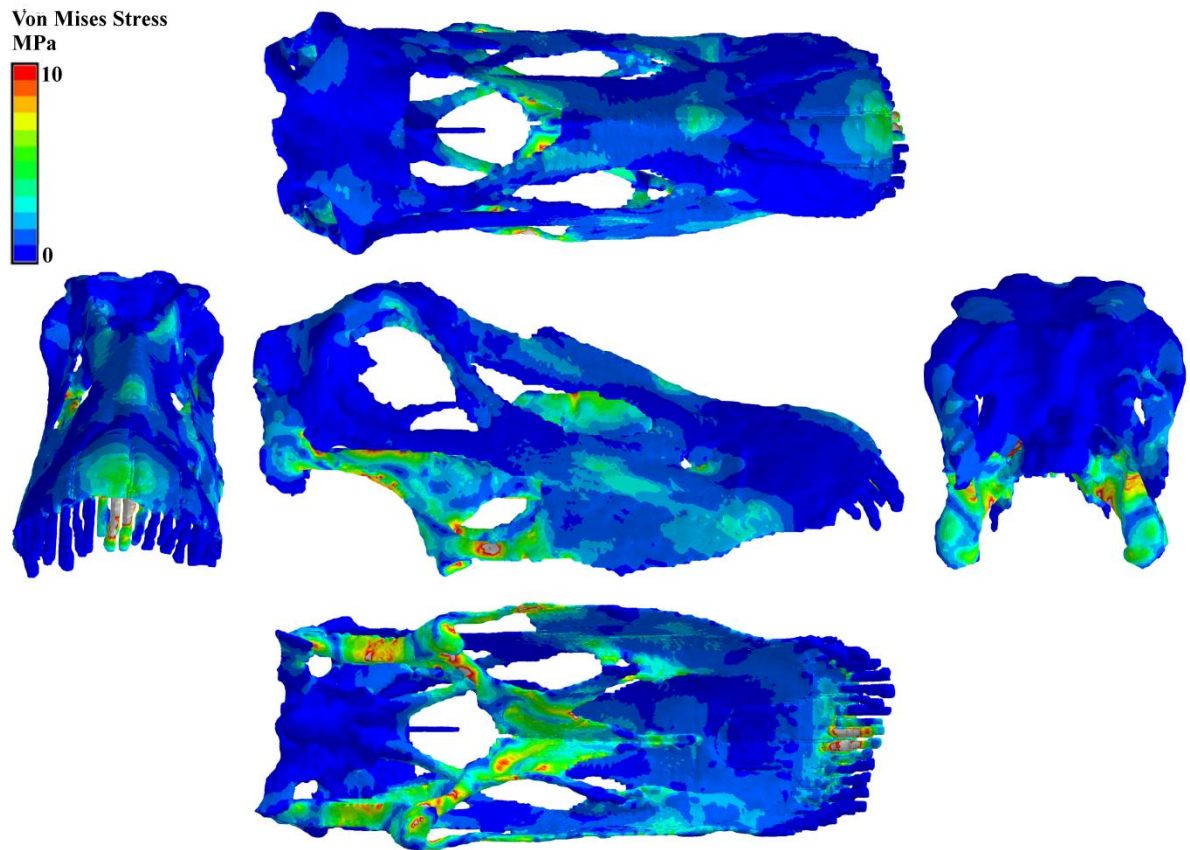

644

645 **Figure S22:** Additional views of the FEA results for the skull of *Diplodocus carnegii*, scaled  
 646 so that overall applied force/skull surface area equals that of *Camarasaurus* (the “structural  
 647 comparison”).

648 **11. Branch-stripping analyses**

649 In addition to the static biting analyses, the ‘branch-stripping’ analyses of Young *et al.* [45]  
 650 were also performed here, but with inclusion of the pull of the craniocervical musculature,  
 651 wherein all muscle groups were modelled as contracting simultaneously. The skull of each  
 652 taxon was modelled as if simultaneously biting and retracting the head in a posteriorly-  
 653 directed motion, as if pulling to detach plant matter. Although there is no evidence of branch-  
 654 stripping behaviour in *Camarasaurus*, tugging and wrenching motions would have been part  
 655 of its foraging repertoire [11]. Additionally, given that *Camarasaurus* more closely

656 approximates the plesiomorphic sauropod condition, stripping behaviour was modelled here  
657 to provide a null model against which purported stripping-specific adaptations of *Diplodocus*  
658 could be tested.

659 The models were constrained at the anterior four biting teeth as above, and fully constrained  
660 at the occipital condyle. A stripping force was applied at the teeth equal to the shear strength  
661 of parenchyma ( $1E06 \text{ Nm}^{-2}$ ) multiplied by the area of the tooth in contact with the vegetation,  
662 after Young *et al.* [45]. Forces were calculated per tooth and then applied individually to each  
663 stripping tooth. Total stripping forces are given in table S9. The broad teeth of *Camarasaurus*  
664 result in very high stripping stresses; suggesting the absence of this behaviour in this taxon.  
665 Sensitivity analyses constraining and loading six, eight and 10 teeth were also performed  
666 figures S23, S24).

667 In *Diplodocus* the distribution and magnitude of stress resulting from branch-stripping is  
668 similar to that observed under static biting, so that it seems equally well-adapted to either [45]  
669 (figure S23). High stress is restricted to the condyle constraint point (where it is an artefact of  
670 the constraint) and in parts of the stripping teeth (figure S24). Elevated stress is also seen  
671 around the occipital condyle (especially at the ventral margin of the foramen magnum) and in  
672 the elongated basiptyergoid processes.

673 In contrast, *Camarasaurus* performs significantly worse under branch-stripping than static  
674 biting (figure S24), as anticipated from the lack of specializations associated with such a  
675 behaviour that are seen in *Diplodocus* (the slender, procumbent dentition, the overlapping  
676 maxilla-dentary ‘pseudocheek’ etc. [see 11, 45, 46]) and the large forces applied to the teeth.  
677 Very high stresses are observed in the snout (figure S24), as a consequence of these very  
678 large forces acting upon the stripping teeth.



679 **Table S9**

| Taxon               | Total tooth area/m <sup>2</sup> | Total applied branch stripping force |
|---------------------|---------------------------------|--------------------------------------|
| <i>Diplodocus</i>   |                                 |                                      |
| 4 teeth             | 1E-04                           | 100                                  |
| 6 teeth             | 1.5E-04                         | 150                                  |
| 8 teeth             | 2E-04                           | 200                                  |
| 10 teeth            | 3.5E-04                         | 350                                  |
| <i>Camarasaurus</i> |                                 |                                      |
| 4 teeth             | 3.71E-03                        | 3712                                 |
| 6 teeth             | 5.36E-03                        | 5364                                 |
| 8 teeth             | 7.02E-03                        | 7016                                 |
| 10 teeth            | 8.67E-03                        | 8668                                 |

680

681 **Table S9: Branch stripping forces** calculated for each taxon.

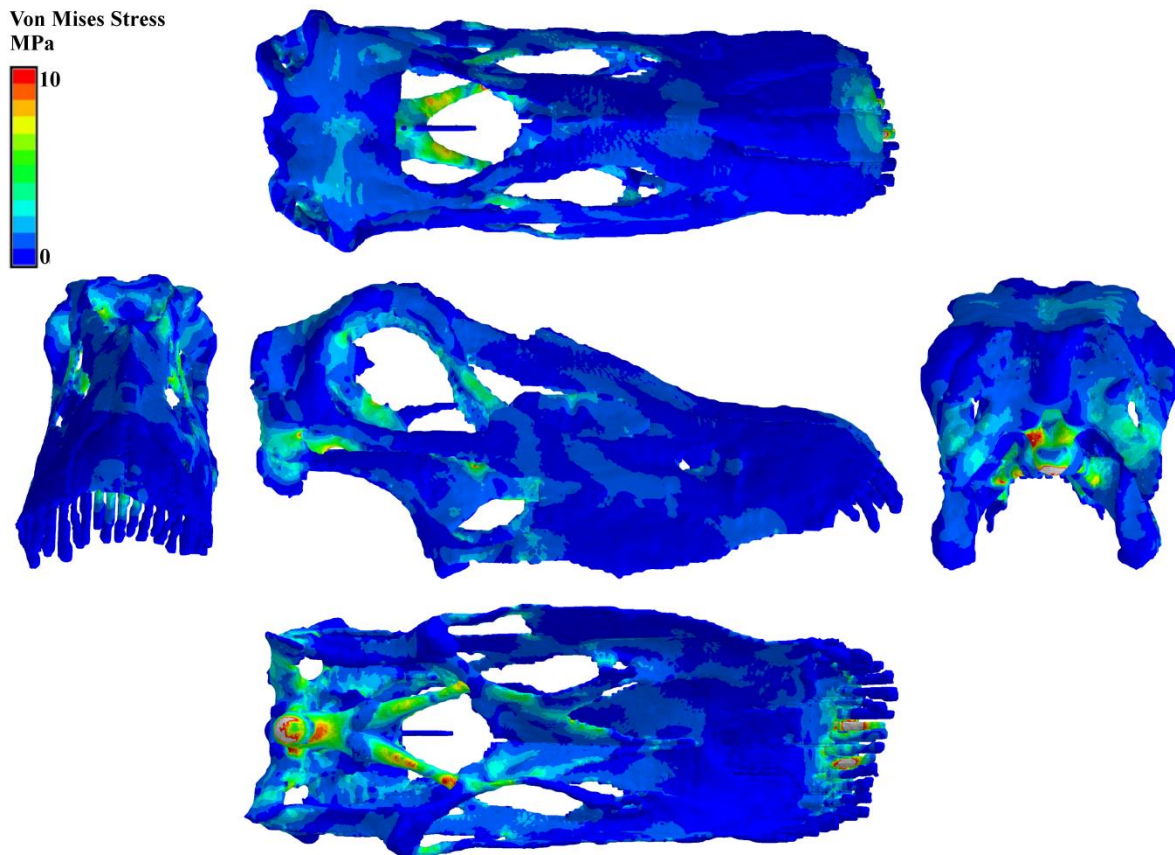

682

683 **Figure S23:** FEA results of branch stripping (applied to four teeth) in *Diplodocus*.

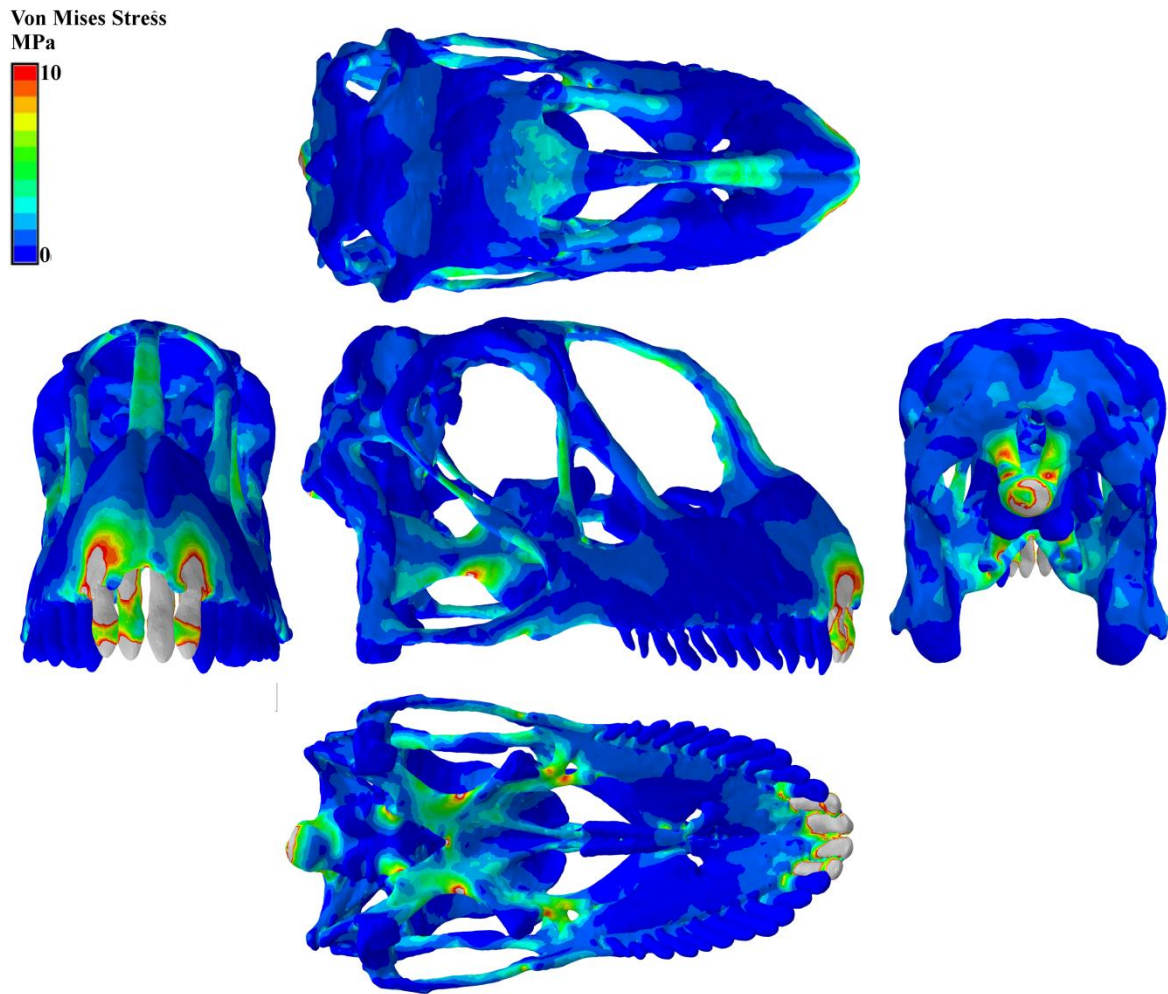

684

685 **Figure S24:** FEA results of branch stripping (applied to four teeth) in *Camarasaurus*.

686

687

688

## 12. Supplementary references

689 [1] Salgado, L., Coria, R. A. & Calvo, J.O. 1997 Evolution of titanosaurid sauropods. I  
690 Phylogenetic analysis based on the postcranial evidence. *Ameghiniana* **34**, 3-32.

691 [2] McPhee, B. W., Yates, A. M., Choiniere, J. N. & Abdala, F. 2014 The complete  
692 anatomy and phylogenetic relationships of *Antetonitrus ingenipes* (Sauropodiformes,  
693 Dinosauria): implications for the origins of Sauropoda. *Zoological Journal of the Linnean  
694 Society*, **171**, 151-205.

695 [3] D'Emic, M. D. 2013 Revision of the sauropod dinosaurs of the Lower Cretaceous  
696 Trinity Group, southern USA, with the description of a new genus. *Journal of Systematic  
697 Paleontology*, **11**, 707-726.

698 [4] Ikejiri, T., Tidwell, V. & Trexler, D. L. 2005 New adult specimens of *Camarasaurus*  
699 *lentus* highlight ontogenetic variation within the species. In *Thunder Lizards: The  
700 Sauropodomorph Dinosaurs* (eds. Carpenter, K. & Tidwell, V.) pp. 154-179,  
701 Bloomington: University of Indiana Press.

702 [5] Anderson, P. S. L. 2009 Biomechanics functional patterns, and disparity in Late  
703 Devonian arthrodiros. *Paleobiology* **35**, 321-342.

704 [6] Anderson, P. S. L., Friedman, M., Brazeau, M. D. & Rayfield, E.J. 2011 Initial  
705 radiation of jaws demonstrated stability despite faunal and environmental change. *Nature*  
706 **476**, 206-209.

707 [7] Anderson, P.S.L., Friedman, M. & Ruta, M. 2013 Late to the table: diversification of  
708 tetrapod mandibular biomechanics lagged behind evolution of terrestriality. *Integrative  
709 and Comparative Biology* **53**, 283-294.

- 710 [8] Stubbs, T. L., Pierce, S. E., Rayfield, E. J. & Anderson, P. S. L. 2013 Morphological  
711 and biomechanical disparity of crocodile-line archosaurs following the end-Triassic  
712 extinction. *Proc. R. Soc. Lond. B* **280**, 20131940.
- 713 [9] Calvo, J. O. 1994 Jaw mechanics in sauropod dinosaurs. *Gaia* **10**, 183-193.
- 714 [10] Christiansen, P. 2000 Feeding mechanisms of the sauropod dinosaurs *Brachiosaurus*,  
715 *Camarasaurus*, *Diplodocus* and *Dicraeosaurus*. *Historical Biology* **14**, 137-152.
- 716 [11] Upchurch, P. & Barrett, P. M. 2000 The evolution of sauropod feeding mechanisms.  
717 In *Evolution of Herbivory in Terrestrial Vertebrates: Perspectives from the fossil record*  
718 (ed. Sues H-D), pp. 79-122. Cambridge: Cambridge University Press, Cambridge.
- 719 [12] Upchurch, P. & Barrett, P. M. 2005 Sauropodomorph diversity through time:  
720 macroevolutionary and paleoecological implications. In *The Sauropods: Evolution and*  
721 *Paleobiology* (eds. Curry-Rogers, K. A. & Wilson, J. A.), pp. 104-121. Berkeley:  
722 University of California Press.
- 723 [13] Wilson, J. A. & Sereno, P. C. 1998 Early evolution and higher-level phylogeny of  
724 sauropod dinosaurs. *Society of Vertebrate Paleontology* **18**, 1-79.
- 725 [14] Hildebrand, M. 1982 *Analysis of Vertebrate Structure: 2<sup>nd</sup> Edition*. Hoboken: John  
726 Wiley & Sons.
- 727 [15] Westneat, M. W. 1994 Transmission of force and velocity in the feeding mechanisms  
728 of labrid fishes (Teleostei, Perciformes). *Zoomorphology* **114**, 103-118.
- 729 [16] Westneat, M. W. 2003 A biomechanical model for analysis of muscle force, power  
730 output and lower jaw motion in fishes. *Journal of Theoretical Biology* **223**, 269-281.

- 731 [17] Wainwright, P. C. & Richards, B. A. 1995 Predicting patterns of prey use from  
732 morphology with fishes. *Environmental Biology of Fishes* **44**, 97-113.
- 733 [18] Sakamoto, M. 2010 Jaw biomechanics and the evolution of biting performance in  
734 theropod dinosaurs. *Proceedings of the Royal Society B: Biological Sciences* **277**, 3327-  
735 3333.
- 736 [19] Stayton, C. T. 2006 Testing hypotheses of convergence with multivariate data:  
737 morphological and functional convergence among herbivorous lizards. *Evolution* **60**, 824-  
738 841.
- 739 [20] Fiorillo, A. R. 1998 Dental microwear patterns of the sauropod dinosaurs  
740 *Camarasaurus* and *Diplodocus*: evidence for resource partitioning in the Late Jurassic of  
741 North America. *Historical Biology* **13**, 1-16.
- 742 [21] Janis, C. M. 1995 Correlations between craniodental morphology and feeding  
743 behaviour in ungulates: reciproca illumination between living and fossil taxa. In  
744 *Functional Morphology in Vertebrate Paleontology* (ed. Thomason, J. J.), pp. 76-98.  
745 Cambridge: Cambridge University Press.
- 746 [22] Sues, H.-D. 2000 Herbivory in terrestrial vertebrates: an introduction. In *Evolution of*  
747 *Herbivory in Terrestrial Vertebrates: Perspectives from the Fossil Record* (ed. Sues, H.-  
748 D.), pp. 1-9. Cambridge: Cambridge University Press.
- 749 [23] Wainwright, S. A., Briggs, W. D., Currey, J. D. & Gosline, J. M. 1976. *Mechanical*  
750 *Design in Organisms*. London: Edward Arnold Publishers.
- 751 [24] Vogel, S. 2003 *Comparative Biomechanics: Life's Physical World* Princeton:  
752 Princeton University Press.

- 753 [25] Daegling, D. J. 2001 Biomechanical scaling of the Hominoid mandibular symphysis.  
754 *Journal of Morphology* **250**, 12-23.
- 755 [26] Summers, A. P., Ketcham, R. A. & Rowe, T. 2004 Structure and function of the  
756 Horn Shark (*Heterodontus francisci*) cranium through ontogeny: development of a hard  
757 prey specialist. *Journal of Morphology* **260**, 1-12.
- 758 [27] Metzger, K. A., Daniel, W. J. T., Ross, C. F. 2005 Comparison of beam theory and  
759 finite-element analysis with *in vivo* bone strain data from the alligator cranium. *The*  
760 *Anatomical Record* **283**, 331-348.
- 761 [28] Foffa, D., Cuff, A., Sassoon, J., Rayfield, E. J., Mavrogordato, M. & Benton, M. J.  
762 2014. Functional anatomy and feeding biomechanics of a giant Upper Jurassic pliosaur  
763 (Reptilia: Sauropterygia) from Weymouth Bay, Dorset, UK. *Journal of Anatomy* **225**,  
764 209-219.
- 765 [29] Holliday, C. M. & Nesbitt, S. J. 2013 Morphology and diversity of the mandibular  
766 symphysis of archosauriformes. *Geological Society of London, Special Publications* **379**,  
767 555-571.
- 768 [30] Porro, L. B., Holliday, C. M., Anapol, F., Ontiveros, L. C., Ontiveros, L. T. & Ross,  
769 C. F. 2011 Free body analysis, beam mechanics, and Finite Element Modelling of  
770 *Alligator mississippiensis*. *Journal of Morphology* **272**, 910-937.
- 771 [31] Walmsley, C.W., Smits, P. D., Quayle, M. R., McCurry, M. R., Richards, H. S.,  
772 Oldfield, C. C, Wroe, S., Clausen, P. D. & McHenry, C. R. 2013 Why the long face? The  
773 mechanics of mandibular symphysis proportions in crocodiles. *PLoS One* **8**, e53873.
- 774 [32] Holliday, C. M. 2009 New insights into dinosaur jaw muscle anatomy. *The*  
775 *Anatomical Record* **292**, 1246-1265.

- 776 [33] Sereno, P.C., Wilson, J. A., Witmer, L. M., Whitlock, J. A., Maga, A., Ide, O. &  
777 Wroe, T. 2007. Structural extremes in a Cretaceous dinosaur. *PLoS One* **2**, e1230.
- 778 [34] Boué, C. 1970 Morphologie fonctionnelle des dents labiales chez ruminants.  
779 *Mammalia* **34**, 696-711.
- 780 [35] Bell, R. H. V. 1971 A grazing ecosystem in the Serengeti. *Sci. Am.* **224**, 86–93.
- 781 [36] Gordon, I. J. & Illius, A. W. 1989 Resource partitioning by ungulates on the Isle of  
782 Rhum. *Oecologia* **79**, 383-389.
- 783 [37] Janis, C. M. 1988 Correlation of relative muzzle width and relative incisor width  
784 with dietary preference in ungulates. *Zoological Journal of the Linnean Society* **92**, 267-  
785 284.
- 786 [38] Spencer, L. M. 1995 Morphological correlates of dietary resource partitioning in the  
787 African Bovidae. *Journal of Mammalogy*. **76**, 448–471.
- 788 [39] Fraser, D. & Theodor, J. M. 2011 Comparing ungulate dietary proxies using  
789 discriminant function analysis. *Journal of Morphology* **272**, 1513-1526.
- 790 [40] Solounias, N., Teaford, M. & Walker, A. 1988 Interpreting the diet of extinct  
791 ruminants: the case of a non-browsing giraffid. *Paleobiology* **14**, 287-300.
- 792 [41] Solounias, N. & Moelleken, S. M. C. 1993 Dietary adaptations of some extinct  
793 ruminants determined by premaxillary shape. *Journal of Mammalogy* **74**, 1059-1071.
- 794 [42] Dompierre, H. & Churcher, C. S. 1996 Premaxillary shape as an indicator of the diet  
795 of seven extinct late Cenozoic new world camels. *Journal of Vertebrate Paleontology* **16**,  
796 141-148.

- 797 [43] Carrano, M. T., Janis, C. M. & Sepkoski, J. J. Jr. 1999 Hadrosaurs as ungulate  
798 parallels: Lost lifestyles and deficient data. *Acta Palaeontologica Polonica* **44**, 237-261.
- 799 [44] Whitlock, J. A. 2011 Inferences of Diplodocoid (Sauropoda: Dinosauria) Feeding  
800 Behaviour from Snout Shape and Microwear Analyses. *PLoS One* **6**, e18304.
- 801 [45] Young, M. T., Rayfield, E. J., Holliday, C. M., Witmer, L. M., Button, D. J.,  
802 Upchurch, P. & Barrett, P. M. 2012 Cranial biomechanics of *Diplodocus* (Dinosauria,  
803 Sauropoda): testing hypotheses of feeding behaviour in an extinct megaherbivore.  
804 *Naturwissenschaften* **99**, 637-643. (DOI: 10.1007/s00114-012-0944-y)
- 805 [46] Barrett, P. M. & Upchurch, P. 1994 Feeding mechanisms of *Diplodocus*. *Gaia* **10**,  
806 195-204.
- 807 [47] Upchurch, P. 1998 The phylogenetic relationships of sauropod dinosaurs. *Zoological*  
808 *Journal of the Linnean Society* **124**, 43-103.
- 809 [48] Chure, D., Britt, B. B., Whitlock, J. A. & Wilson, J.A. 2010 First complete sauropod  
810 dinosaur skull from the Cretaceous of the Americas and the evolution of sauropod  
811 dentition. *Naturwissenschaften* **97**, 379-391.
- 812 [49] Barrett, P. M. & Upchurch, P. 2007 The evolution of feeding mechanisms in early  
813 sauropodomorph dinosaurs. *Special Papers in Palaeontology* **77**, 91-112.
- 814 [50] Allain, R. *et al.* 2004 A basal sauropod dinosaur from the Early Jurassic of Morocco.  
815 *Comptes Rendus Palevol* **3**, 199-208.
- 816 [51] Allain, R. & Aquesbi, N. 2008 Anatomy and phylogenetic relationships of  
817 *Tazoudasaurus naimi* (Dinosauria, Sauropoda) from the late Early Jurassic of Morocco.  
818 *Geodiversitas* **30**, 345-424.



- 819 [52] Sereno, P. C. & Wilson, J. A. 2005 Structure and function of a sauropod tooth  
820 battery. In *The sauropods: evolution and paleobiology* (eds. Curry Rogers, K. A. &  
821 Wilson, J. A.), pp. 157-177. Bloomington: University of Indiana Press.
- 822 [53] Carballido, J. L., Salgado, L., Pol, D., Canudo, J. I. & Garrido, A. 2012 A new basal  
823 rebbachisaurid (Sauropoda, Diplodocoidea) from the Early Cretaceous of the Nequén  
824 Basin: evolution and biogeography of the group. *Historical Biology* **24**, 631-654.
- 825 [54] Hammer, Ø., Harper, D. A. T. & Ryan, P. D. 2001 Past: Palaeontological statistics  
826 software package for education and data analysis. *Palaeontologica Electronica* **4**, 4pp.
- 827 [55] Anderson, M. J. 2001 A new method for non-parametric multivariate analysis of  
828 variance. *Austral Ecology* **26**, 32-46.
- 829 [56] Apaldetti, C., Martinez, R. N., Alcober, O. A. & Pol, D. 2011 A new basal  
830 sauropodomorpha (Dinosauria: Saurischia) from Quelbrada del Barro Formation  
831 (Marayes-El Carrizal Basin), Northwestern Argentina. *PLoS One* **6**, e26964.
- 832 [57] Otero, A. & Pol, D. 2013 Postcranial anatomy and phylogenetic relationships of  
833 *Mussaurus patagonicus* (Dinosauria, Sauropodomorpha). *Journal of Vertebrate*  
834 *Paleontology* **33**, 1138-1168.
- 835 [58] Wilson, J. A. 2002 Sauropod dinosaur phylogeny: critique and cladistic analysis.  
836 *Zoological Journal Linnean Society* **136**, 217-276.
- 837 [59] Upchurch, P., Barrett, P. M. & Dodson, P. 2004 Sauropoda. In *The Dinosauria* (eds.  
838 Weishampel, D. B., Dodson, P. & Osmólska, H.), pp. 259-322. Berkeley: University of  
839 California Press.

- 840 [60] Wilson, J. A. & Upchurch, P. 2009 Redescription and reassessment of the  
841 phylogenetic affinities of *Euhelopus zdanskyi* (Dinosauria: Sauropoda) from the Early  
842 Cretaceous of China. *Journal of Systematic Palaeontology* **7**, 199-239.
- 843 [61] Royo-Torres, R. & Upchurch, P. 2012 The cranial anatomy of the sauropod  
844 *Turiasaurus riodevensis* and implications for its phylogenetic relationships. *Journal of*  
845 *Systematic Paleontology* **10**, 553-583.
- 846 [62] D'Emic, M. D. 2012 The early evolution of titanosauriform sauropod dinosaurs.  
847 *Zoological Journal of the Linnean Society* **166**, 624-671.
- 848 [63] Whitlock, J. A. 2011 A phylogenetic analysis of Diplodocoidea (Saurischia:  
849 Sauropoda). *Zoological Journal of the Linnean Society* **161**, 872-915.
- 850 [64] Fanti, F., Cau, A., Hassine, M. & Contessi, M. 2013 A new sauropod dinosaur from  
851 the Early Cretaceous of Tunisia with extreme avian-like pneumatisation. *Nature*  
852 *Communications* **4**, 1-7.
- 853 [65] Zaher, H. *et al.* 2011 A complete skull of an Early Cretaceous sauropod and the  
854 evolution of advanced titanosaurians. *PLoS One* **6**, e16663.
- 855 [66] Mannion, P. D., Upchurch, P., Barnes, R. N. & Mátéus, O. 2013 Osteology of the  
856 Late Jurassic Portuguese sauropod dinosaur *Lusotitan atalaiensis* (Macronaria) and the  
857 evolutionary history of basal titanosauriformes. *Zoological Journal of the Linnean Society*  
858 **168**, 98-206.
- 859 [67] Klein, N., Sander, P. M., Stein, K., Le Loeuff, J., Carballido, J. L. & Buffetaut, E.  
860 2012 Modified lamellar bone in *Ampelosaurus atacis* and other titanosaurs (Sauropoda):  
861 implications for life history and physiology. *PLoS One* **7**, e36907.

- 862 [68] Kutty, T. S., Chatterjee, S., Galton, P. M. & Upchurch, P. 2007 Basal  
863 sauropodomorphs (Dinosauria: Saurischia) from the Lower Jurassic of India: Their  
864 anatomy and relationships. *Journal of Vertebrate Paleontology* **81**, 1218-1240.
- 865 [69] Bapst, D. W. 2012 Paleotree: an R package for paleontological and phylogenetic  
866 analyses of evolution. *Methods in Ecology and Evolution* **3**, 803-807. (DOI: DOI:  
867 10.1111/j.2041-210X.2012.00223.x)
- 868 [70] Brusatte, S. L., Benton, M. J., Ruta, M. & Lloyd, G. T. 2008 Superiority,  
869 competition, and opportunism in the evolutionary radiation of dinosaurs. *Science* **321**,  
870 1485-1488.
- 871 [71] Revell, L. J. 2012 Phytools: an R package for phylogenetic comparative biology  
872 (and other things). *Methods in Ecology and Evolution* **3**, 217-223.
- 873 [72] Snively, E. & Russell, A. P. 2007 Functional variation of neck muscles and their  
874 relation to feeding style in Tyrannosauroida and other large theropod dinosaurs. *The*  
875 *Anatomical Record*, **290**, 934-957.
- 876 [73] Cleuren, J. & De Vree, F. 2000 Feeding in crocodylians. In *Feeding: Form, Function*  
877 *and Evolution in Tetrapod Vertebrates* (ed. Schwenk K.) pp. 337-358, San Diego:  
878 Academic Press.
- 879 [74] Tsuihiji, T. 2010. Reconstructions of the axial insertions in the occipital regions of  
880 dinosaurs: evaluations of past hypotheses on marginocephalia and tyrannosauridae using  
881 the extant phylogenetic bracket approach. *The Anatomical Record* **293**, 1360-1386.
- 882 [75] Snively, E., Russell, A. P., Powell, G. L., Theodor, J. M. & Ryan, M. J. 2014. The  
883 role of the neck in the feeding behaviour of the Tyrannosauridae: inference based on  
884 kinematics and muscle function of extant avians. *Journal of Zoology* **292**, 290-303.

- 885 [76] Thomason, J. J. 1991 Cranial strength in relation to estimated biting forces in some  
886 mammals. *Canadian Journal of Zoology* **69**, 2326-2333.
- 887 [77] Lautenschlager, S. 2012 Cranial myology and bite force performance of  
888 *Erlikosaurus andrewsi*: a novel approach for digital muscle reconstructions. *Journal of*  
889 *Anatomy* **222**, 260-272. (DOI: 10.1111/joa.12000)
- 890 [78] Madsen, J. H. Jr., McIntosh, J. S. & Berman, D. S. 1995 Skull and atlas-axis  
891 complex of the Upper Jurassic sauropod *Camarasaurus* (Reptilia: Saurischia). *Bulletin of*  
892 *Carnegie Museum of Natural History* **31**, 1-115.
- 893 [79] Thomason, J. J., Russell, A. P. & Morgeli, M. 1990 Forces of biting, body size, and  
894 masticatory muscle tension in the opossum *Didelphis virginiana*. *Canadian Journal of*  
895 *Zoology* **68**, 318–324.
- 896 [80] Rayfield, E. J. 2007 Finite Element Analysis and Understanding the Biomechanics  
897 and Evolution of Living and Fossil Organisms. *Annual Review of Earth and Planetary*  
898 *Sciences* **35**, 541-576.
- 899 [81] Zapata, U. Metzger, K. A., Wang, Q., Dechow, P. C. & Ross, C. F. 2010 Material  
900 properties of mandibular cortical bone in the American alligator, *Alligator*  
901 *mississippiensis*. *Bone* **46**, 860-867.
- 902 [82] Strait, D. S., Wang, Q., Dechow, P. C., Ross, C. F., Richmond, B. G., Spencer, M. A.  
903 & Patel, B. A. 2005 Modeling elastic properties in finite element analysis: how much  
904 precision is needed to produce an accurate model? *The Anatomical Record* **283**, 275–287.
- 905 [83] Bright, J. A. & Rayfield, E. J. 2011 Sensitivity and *ex vivo* validation of finite  
906 element models of the domestic pig cranium. *Journal of Anatomy* **219**, 456-471.

- 907 [84] Curry, K. A. 1999 Ontogenetic histology of *Apatosaurus* (Dinosauria: Sauropoda):  
908 New insights on growth rates and longevity. *Journal of Vertebrate Paleontology* **19**, 654-  
909 665.
- 910 [85] Reilly, D., Burstein, A. 1975 The elastic and ultimate properties of compact bone  
911 tissue. *Journal of Biomechanics* **8**, 393–405.
- 912 [86] Gilmore, R. S., Pollack, R. P. & Katz, J. L. 1969 Elastic properties of bovine dentine  
913 and enamel. *Archives of Oral Biology* **15**, 787–796.
- 914 [87] Ichim, I., Schmidlin, P. R., Kieser, J. A. & Swain, M. V. 2007 Mechanical evaluation  
915 of cervical glass-ionomer restorations: 3D finite element study. *Journal of Dentistry* **35**,  
916 28–35.
